# Supplementary material for: The impact of prioritisation and dosing intervals on the effects of COVID-19 vaccination in Europe: an agent-based cohort model
Source: PubMed Central journal article supplement (PMC8458447; doi:10.1038/s41598-021-98216-0), 2021-09-22
Supplement: 41598_2021_98216_MOESM2_ESM.pdf [file 41598_2021_98216_MOESM2_ESM.pdf]

## The impact of prioritisation and dosing intervals on the effects of COVID-19 vaccination in Europe: an agent-based cohort model

Martí Català, Xintong Li, Clara Prats\*, Daniel Prieto-Alhambra

[\\*clara.prats@upc.edu](mailto:clara.prats@upc.edu)

### SUPPLEMENTARY MATERIAL: Different countries configuration

**Table 1.** Initial parameters configuration for different countries simulations. Other parameters have their default value. Population structures follow their own age and sex distribution.(1)

|                | Population<br>(1) | Total<br>deaths<br>(2) | Last week<br>deaths<br>(2) | Vaccination<br>speed<br>(2) | Increase in<br>people living in<br>care homes<br>(3–5) | Proportion<br>of nurses<br>per<br>resident<br>(3–5) |
|----------------|-------------------|------------------------|----------------------------|-----------------------------|--------------------------------------------------------|-----------------------------------------------------|
| Austria        | 9006400           | 7237                   | 743                        | 0,14%                       | 0,87                                                   | Def.                                                |
| Belgium        | 11589616          | 20572                  | 723                        | 0,10%                       | 2,16                                                   | Def.                                                |
| Bulgaria       | 6948445           | 8651                   | 730                        | 0,01%                       | 0,05                                                   | Def.                                                |
| Croatia        | 4105267           | 4711                   | 505                        | 0,07%                       | 0,25                                                   | Def.                                                |
| Cyprus         | 1207361           | 176                    | 42                         | 0,09%                       | 1,18                                                   | Def.                                                |
| Czech Republic | 10708982          | 14820                  | 2389                       | 0,10%                       | 0,73                                                   | Def.                                                |
| Denmark        | 5792203           | 1873                   | 416                        | 0,16%                       | 0,98                                                   | 0,24                                                |
| Europe         | 747636045         | 538618                 | 61799                      | 0,14%                       | 0,60                                                   | Def.                                                |
| Estonia        | 1326538           | 349                    | 86                         | 0,08%                       | 1,40                                                   | 0,05                                                |
| Finland        | 5540718           | 632                    | 56                         | 0,10%                       | 1,26                                                   | Def.                                                |
| France         | 65273510          | 71792                  | 5260                       | 0,09%                       | 1,18                                                   | 0,09                                                |
| Germany        | 83783943          | 50010                  | 12104                      | 0,09%                       | 1,15                                                   | 0,15                                                |
| Greece         | 10423056          | 5545                   | 477                        | 0,05%                       | 0,02                                                   | Def.                                                |
| Hungary        | 9660350           | 11615                  | 1440                       | 0,07%                       | 0,84                                                   | 0,06                                                |
| Iceland        | 341250            | 29                     | 1                          | 0,02%                       | 1,68                                                   | Def.                                                |
| Ireland        | 4937796           | 2768                   | 351                        | 0,16%                       | 0,92                                                   | 0,22                                                |
| Italy          | 60461828          | 83681                  | 6874                       | 0,10%                       | 0,44                                                   | Def.                                                |
| Latvia         | 1886201           | 1032                   | 291                        | 0,06%                       | 0,11                                                   | Def.                                                |
| Lithuania      | 2722289           | 2514                   | 479                        | 0,18%                       | 2,97                                                   | Def.                                                |
| Luxembourg     | 625975            | 562                    | 49                         | 0,07%                       | 1,51                                                   | 0,35                                                |
| Malta          | 441539            | 244                    | 16                         | 0,27%                       | 1,24                                                   | Def.                                                |
| Netherlands    | 17134872          | 13350                  | 1391                       | 0,04%                       | 1,12                                                   | 0,26                                                |
| Norway         | 5421241           | 543                    | 72                         | 0,08%                       | 1,15                                                   | Def.                                                |
| Poland         | 37846605          | 34141                  | 4196                       | 0,09%                       | 0,22                                                   | Def.                                                |
| Portugal       | 10196707          | 9465                   | 1832                       | 0,05%                       | 0,36                                                   | 0,03                                                |
| Romania        | 19237681          | 17485                  | 1214                       | 0,10%                       | 0,14                                                   | Def.                                                |
| Slovakia       | 5459642           | 3737                   | 1034                       | 0,10%                       | 0,88                                                   | Def.                                                |
| Slovenia       | 2078931           | 3257                   | 480                        | 0,13%                       | 1,03                                                   | Def.                                                |

|                |          |       |       |       |      |      |
|----------------|----------|-------|-------|-------|------|------|
| Spain          | 46754782 | 54637 | 2441  | 0,15% | 0,62 | Def. |
| Sweden         | 10099270 | 10797 | 869   | 0,10% | 1,20 | Def. |
| Switzerland    | 8654617  | 8924  | 809   | 0,08% | 1,57 | 0,29 |
| United Kingdom | 67886004 | 93469 | 14429 | 0,42% | 0,92 | Def. |

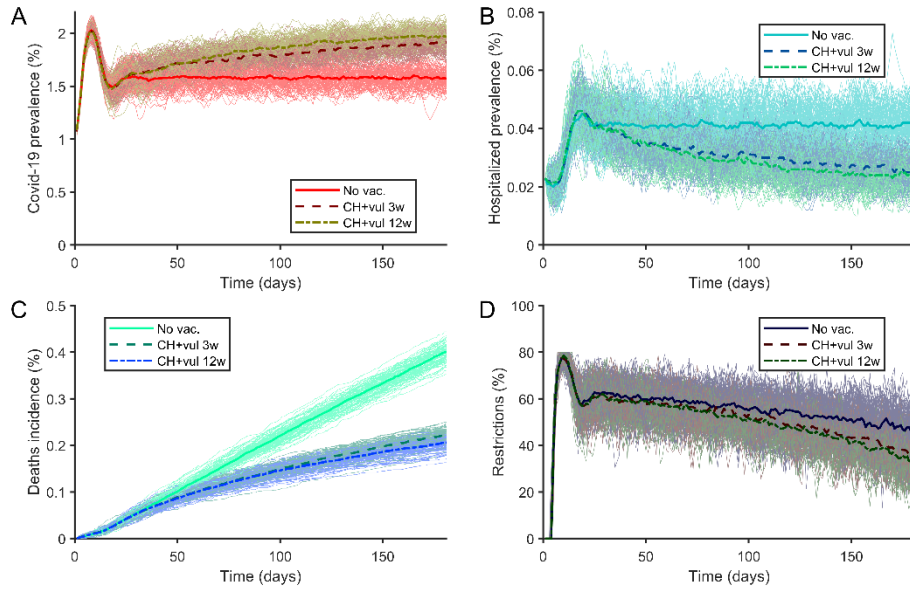

Figure 1. (A) Prevalence of covid-19 cases. (B) Prevalence of hospitalized covid-19 patients. (C) Covid-19 deaths. (D) Restrictions. Solid line for a non-vaccinated population. Dashed line for a population where they are vaccinating first care homes then vulnerable population. Dashed line for doses separation of 3 weeks. Dash-dot line for doses separation of 12 weeks. Figures for AstraZeneca vaccine using Austria conditions described in table 1.

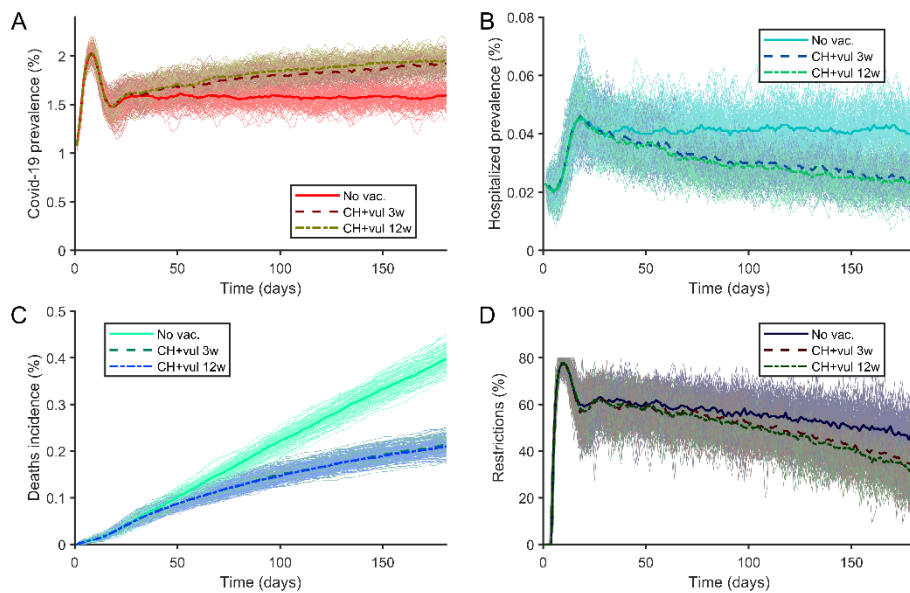

Figure 2. (A) Prevalence of covid-19 cases. (B) Prevalence of hospitalized covid-19 patients. (C) Covid-19 deaths. (D) Restrictions. Solid line for a non-vaccinated population. Dashed line for a population where

they are vaccinating first care homes then vulnerable population. Dashed line for doses separation of 3 weeks. Dash-dot line for doses separation of 12 weeks. Figures for Moderna vaccine using Austria conditions described in table 1.

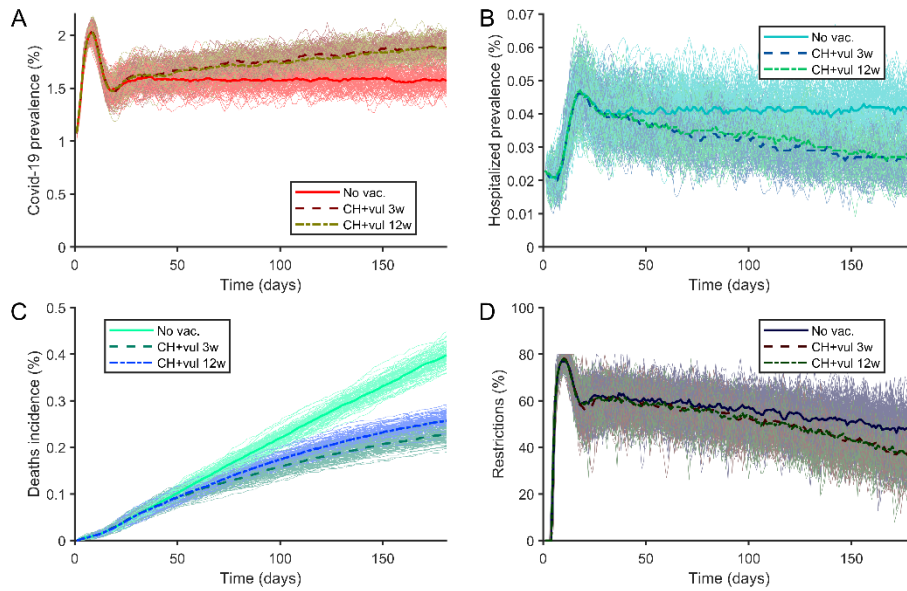

Figure 3. (A) Prevalence of covid-19 cases. (B) Prevalence of hospitalized covid-19 patients. (C) Covid-19 deaths. (D) Restrictions. Solid line for a non-vaccinated population. Dashed line for a population where they are vaccinating first care homes then vulnerable population. Dashed line for doses separation of 3 weeks. Dash-dot line for doses separation of 12 weeks. Figures for Pfizer vaccine using Austria conditions described in table 1.

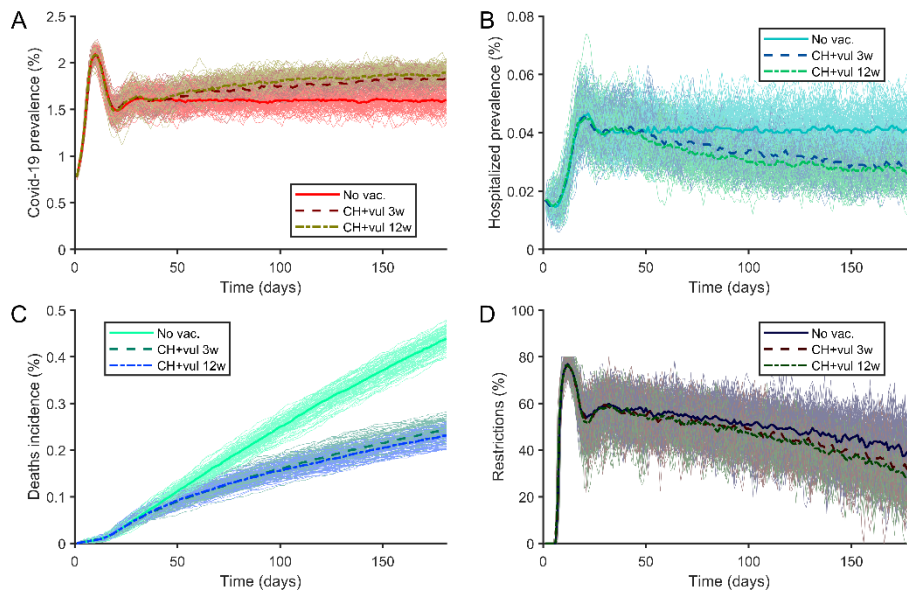

Figure 4. (A) Prevalence of covid-19 cases. (B) Prevalence of hospitalized covid-19 patients. (C) Covid-19 deaths. (D) Restrictions. Solid line for a non-vaccinated population. Dashed line for a population where they are vaccinating first care homes then vulnerable population. Dashed line for doses separation of 3

weeks. Dash-dot line for doses separation of 12 weeks. Figures for AstraZeneca vaccine using Belgium conditions described in table 1.

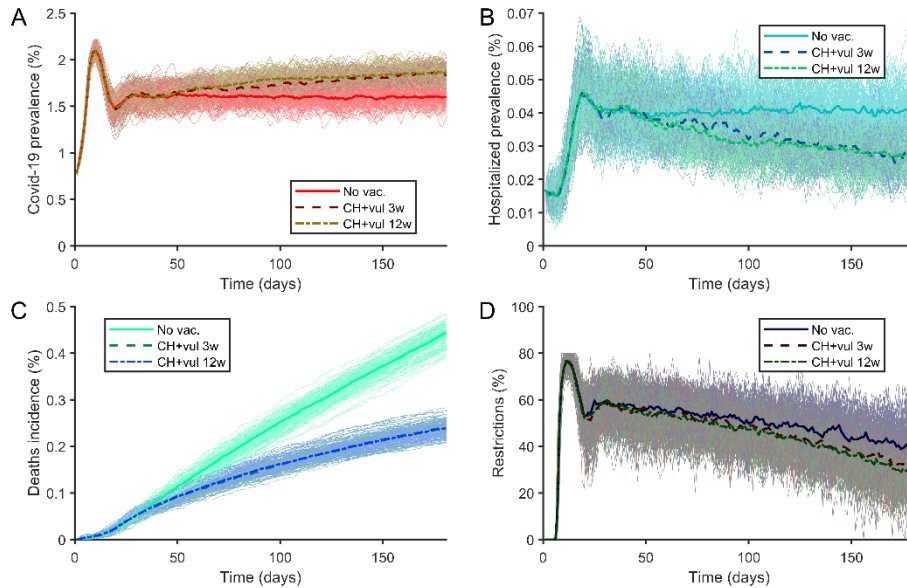

Figure 5. (A) Prevalence of covid-19 cases. (B) Prevalence of hospitalized covid-19 patients. (C) Covid-19 deaths. (D) Restrictions. Solid line for a non-vaccinated population. Dashed line for a population where they are vaccinating first care homes then vulnerable population. Dashed line for doses separation of 3 weeks. Dash-dot line for doses separation of 12 weeks. Figures for Moderna vaccine using Belgium conditions described in table 1.

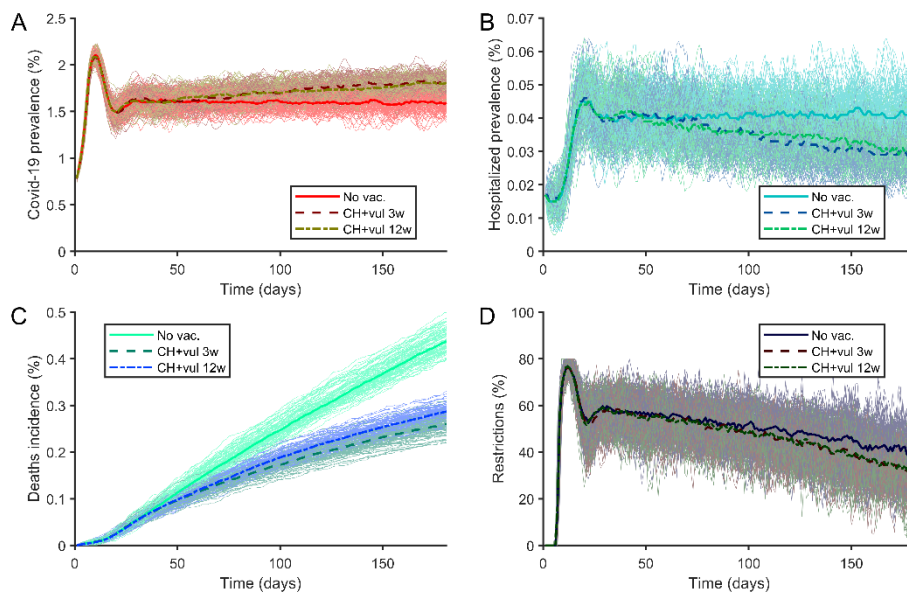

Figure 6. (A) Prevalence of covid-19 cases. (B) Prevalence of hospitalized covid-19 patients. (C) Covid-19 deaths. (D) Restrictions. Solid line for a non-vaccinated population. Dashed line for a population where they are vaccinating first care homes then vulnerable population. Dashed line for doses separation of 3 weeks. Dash-dot line for doses separation of 12 weeks. Figures for Pfizer vaccine using Belgium conditions described in table 1.

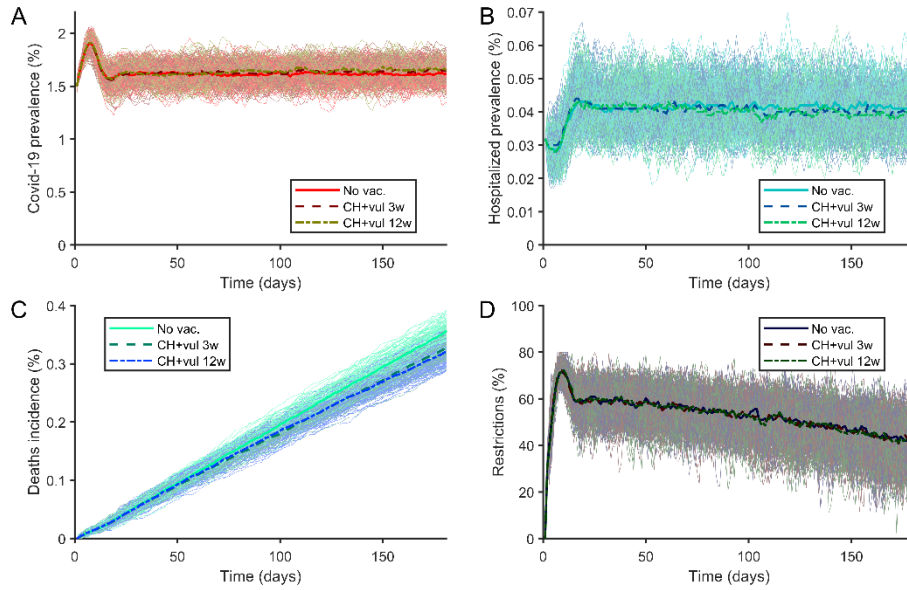

Figure 7. (A) Prevalence of covid-19 cases. (B) Prevalence of hospitalized covid-19 patients. (C) Covid-19 deaths. (D) Restrictions. Solid line for a non-vaccinated population. Dashed line for a population where they are vaccinating first care homes then vulnerable population. Dashed line for doses separation of 3 weeks. Dash-dot line for doses separation of 12 weeks. Figures for AstraZeneca vaccine using Bulgaria conditions described in table 1.

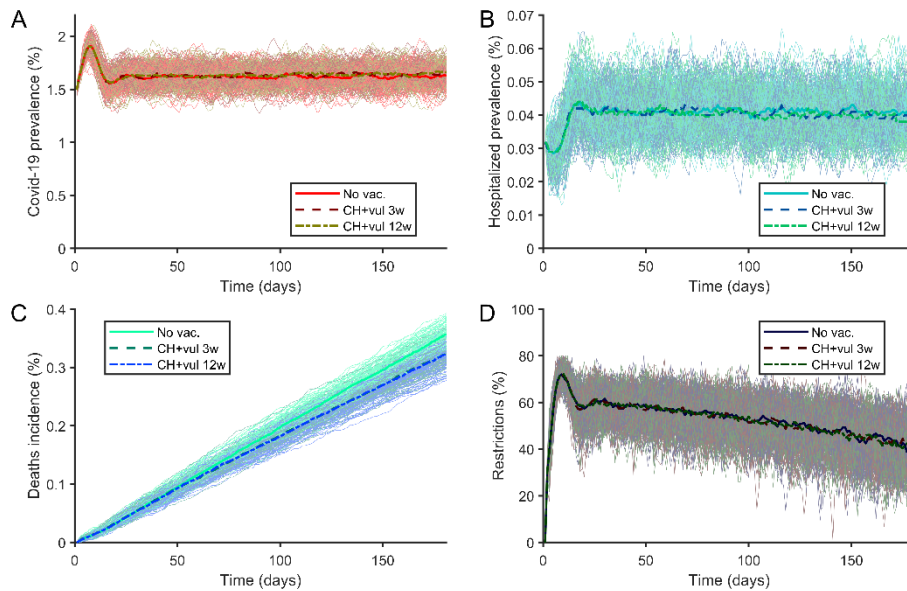

Figure 8. (A) Prevalence of covid-19 cases. (B) Prevalence of hospitalized covid-19 patients. (C) Covid-19 deaths. (D) Restrictions. Solid line for a non-vaccinated population. Dashed line for a population where they are vaccinating first care homes then vulnerable population. Dashed line for doses separation of 3 weeks. Dash-dot line for doses separation of 12 weeks. Figures for Moderna vaccine using Bulgaria conditions described in table 1.

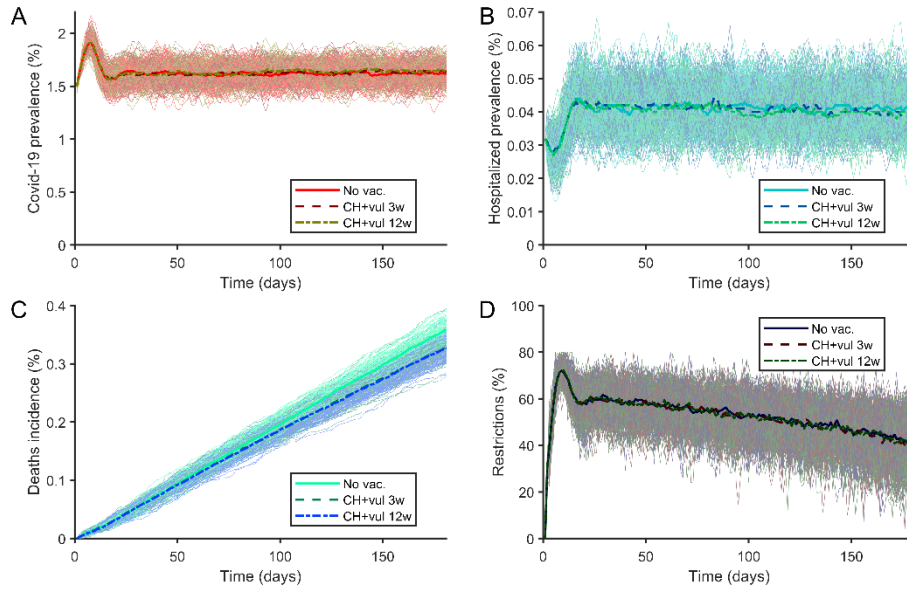

Figure 9. (A) Prevalence of covid-19 cases. (B) Prevalence of hospitalized covid-19 patients. (C) Covid-19 deaths. (D) Restrictions. Solid line for a non-vaccinated population. Dashed line for a population where they are vaccinating first care homes then vulnerable population. Dashed line for doses separation of 3 weeks. Dash-dot line for doses separation of 12 weeks. Figures for Pfizer vaccine using Bulgaria conditions described in table 1.

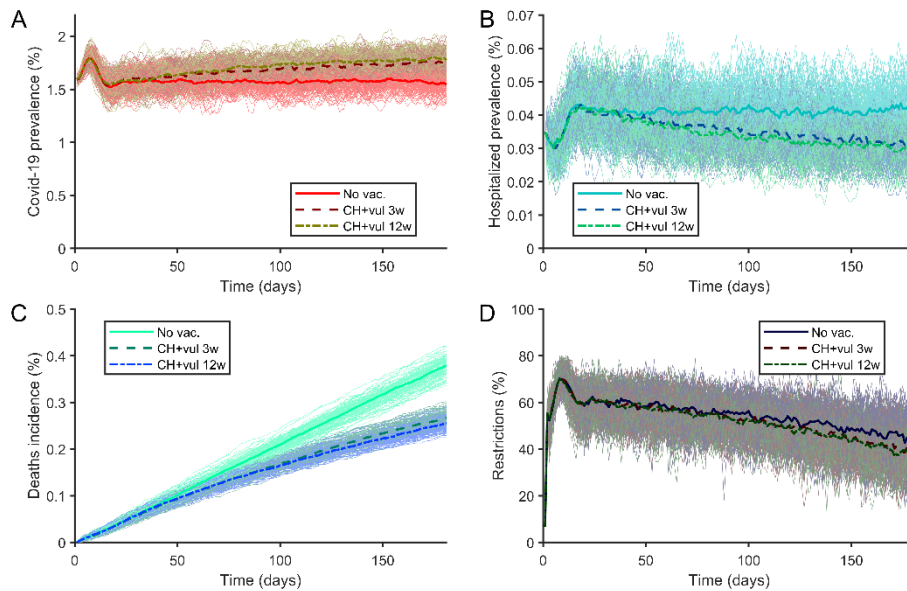

Figure 10. (A) Prevalence of covid-19 cases. (B) Prevalence of hospitalized covid-19 patients. (C) Covid-19 deaths. (D) Restrictions. Solid line for a non-vaccinated population. Dashed line for a population where they are vaccinating first care homes then vulnerable population. Dashed line for doses separation of 3 weeks. Dash-dot line for doses separation of 12 weeks. Figures for AstraZeneca vaccine using Croatia conditions described in table 1.

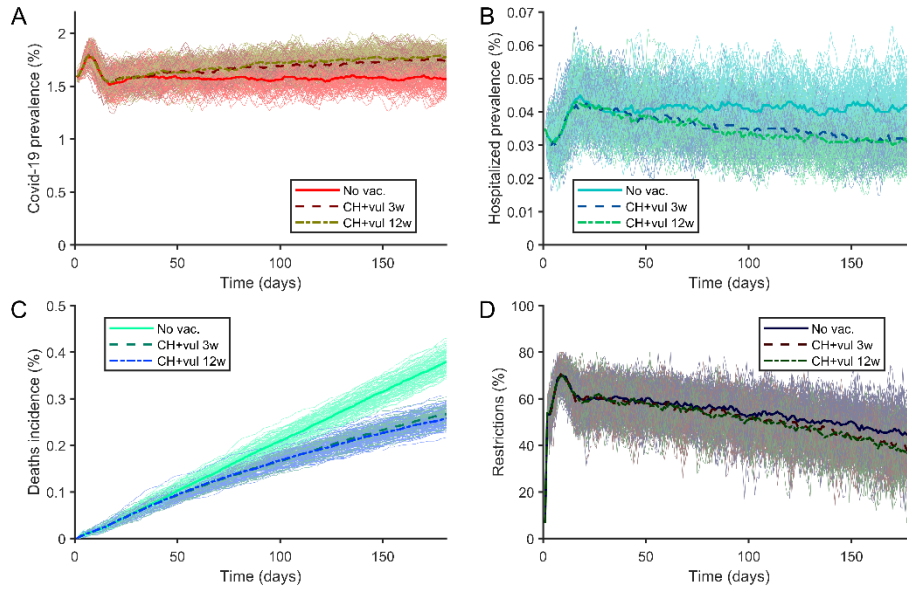

Figure 11. (A) Prevalence of covid-19 cases. (B) Prevalence of hospitalized covid-19 patients. (C) Covid-19 deaths. (D) Restrictions. Solid line for a non-vaccinated population. Dashed line for a population where they are vaccinating first care homes then vulnerable population. Dashed line for doses separation of 3 weeks. Dash-dot line for doses separation of 12 weeks. Figures for Moderna vaccine using Croatia conditions described in table 1.

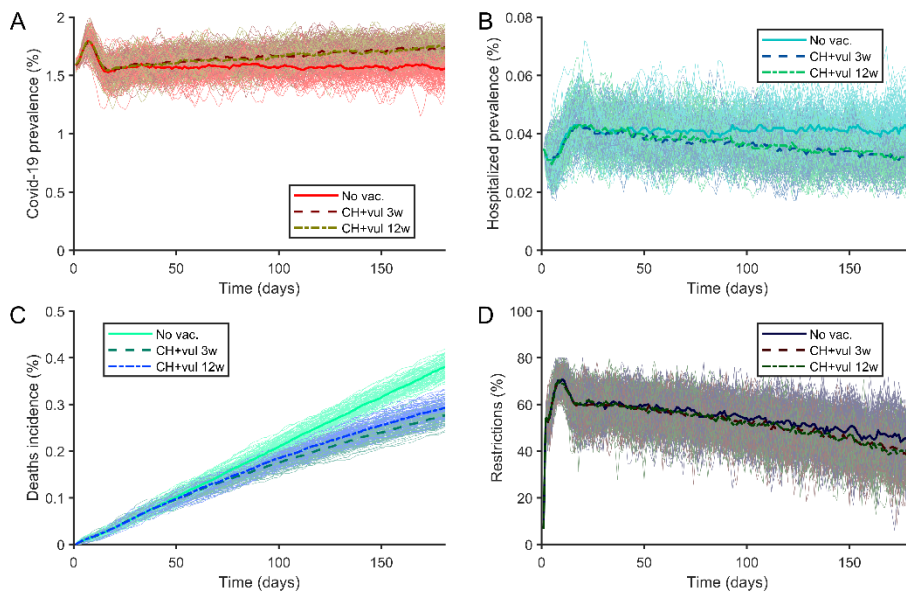

Figure 12. (A) Prevalence of covid-19 cases. (B) Prevalence of hospitalized covid-19 patients. (C) Covid-19 deaths. (D) Restrictions. Solid line for a non-vaccinated population. Dashed line for a population where they are vaccinating first care homes then vulnerable population. Dashed line for doses separation of 3 weeks. Dash-dot line for doses separation of 12 weeks. Figures for Pfizer vaccine using Croatia conditions described in table 1.

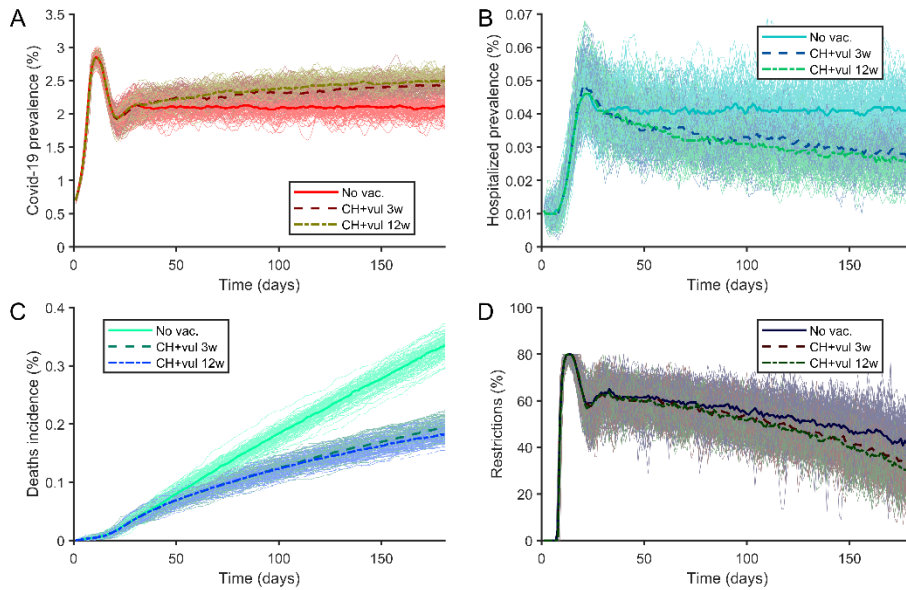

Figure 13. (A) Prevalence of covid-19 cases. (B) Prevalence of hospitalized covid-19 patients. (C) Covid-19 deaths. (D) Restrictions. Solid line for a non-vaccinated population. Dashed line for a population where they are vaccinating first care homes then vulnerable population. Dashed line for doses separation of 3 weeks. Dash-dot line for doses separation of 12 weeks. Figures for AstraZeneca vaccine using Cyprus conditions described in table 1.

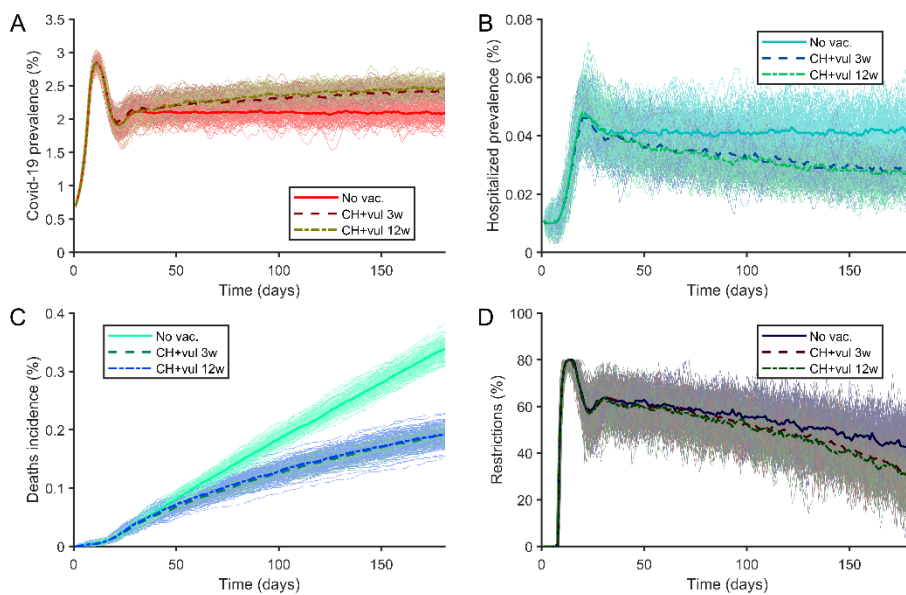

Figure 14. (A) Prevalence of covid-19 cases. (B) Prevalence of hospitalized covid-19 patients. (C) Covid-19 deaths. (D) Restrictions. Solid line for a non-vaccinated population. Dashed line for a population where they are vaccinating first care homes then vulnerable population. Dashed line for doses separation of 3 weeks. Dash-dot line for doses separation of 12 weeks. Figures for Moderna vaccine using Cyprus conditions described in table 1.



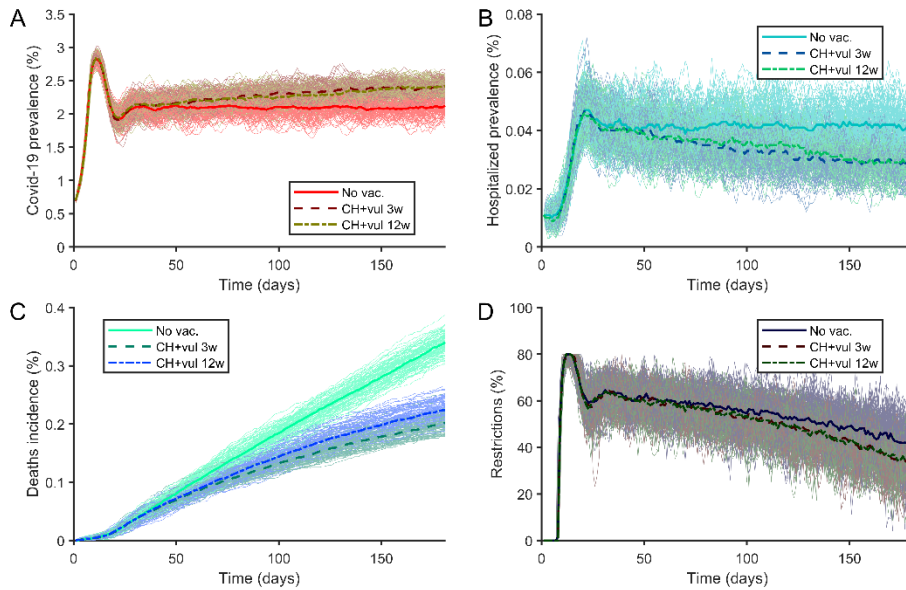

Figure 15. (A) Prevalence of covid-19 cases. (B) Prevalence of hospitalized covid-19 patients. (C) Covid-19 deaths. (D) Restrictions. Solid line for a non-vaccinated population. Dashed line for a population where they are vaccinating first care homes then vulnerable population. Dashed line for doses separation of 3 weeks. Dash-dot line for doses separation of 12 weeks. Figures for Pfizer vaccine using Cyprus conditions described in table 1.

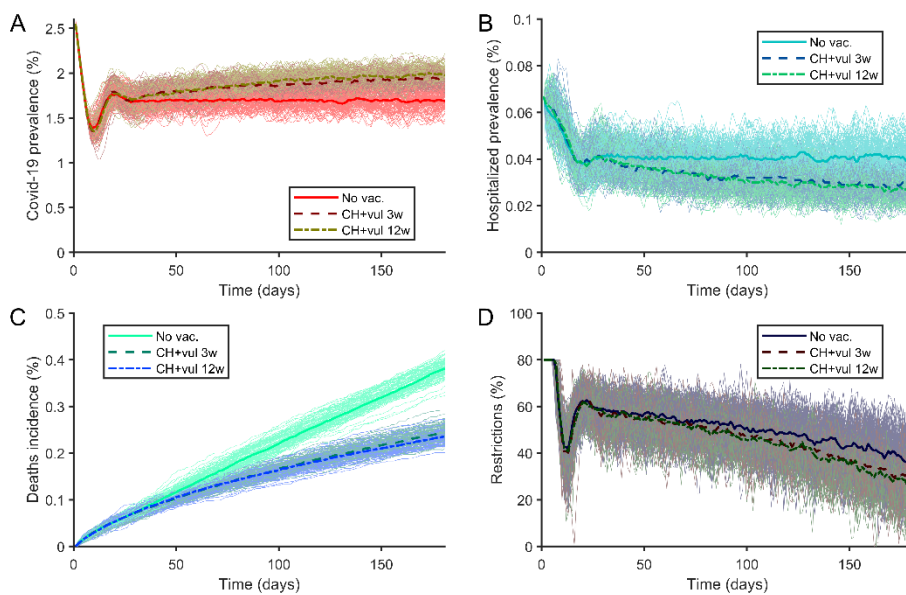

Figure 16. (A) Prevalence of covid-19 cases. (B) Prevalence of hospitalized covid-19 patients. (C) Covid-19 deaths. (D) Restrictions. Solid line for a non-vaccinated population. Dashed line for a population where they are vaccinating first care homes then vulnerable population. Dashed line for doses separation of 3 weeks. Dash-dot line for doses separation of 12 weeks. Figures for AstraZeneca vaccine using Czech Republic conditions described in table 1.

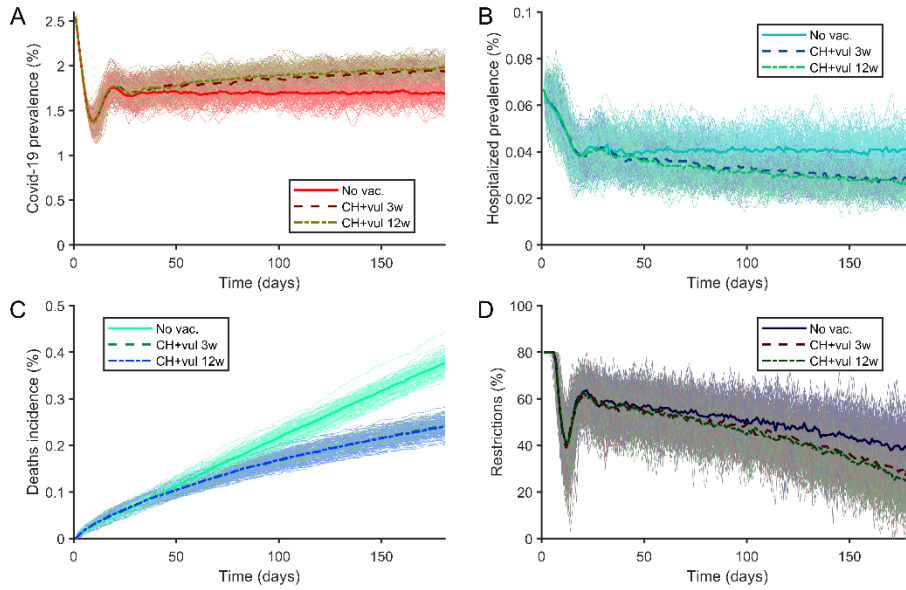

Figure 17. (A) Prevalence of covid-19 cases. (B) Prevalence of hospitalized covid-19 patients. (C) Covid-19 deaths. (D) Restrictions. Solid line for a non-vaccinated population. Dashed line for a population where they are vaccinating first care homes then vulnerable population. Dashed line for doses separation of 3 weeks. Dash-dot line for doses separation of 12 weeks. Figures for Moderna vaccine using Czech Republic conditions described in table 1.

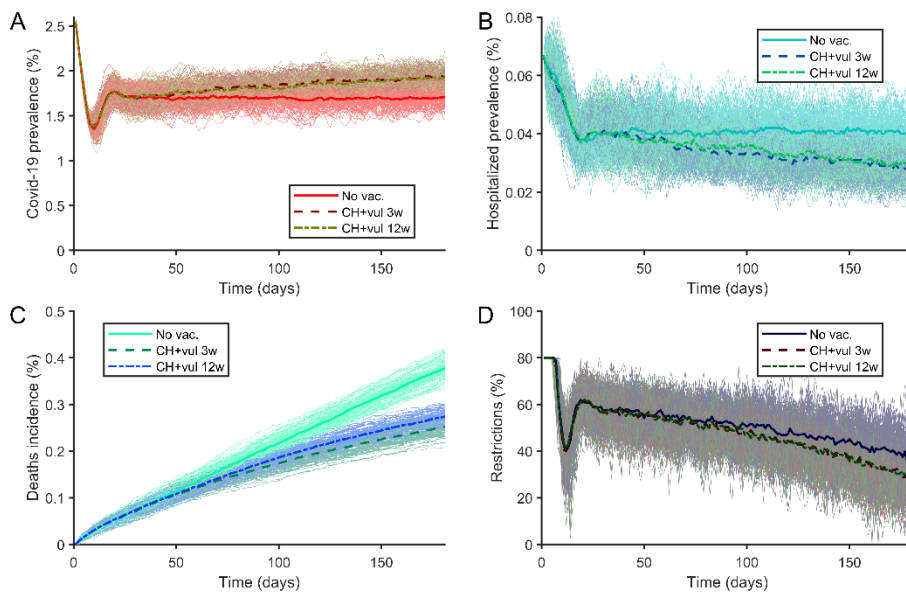

Figure 18. (A) Prevalence of covid-19 cases. (B) Prevalence of hospitalized covid-19 patients. (C) Covid-19 deaths. (D) Restrictions. Solid line for a non-vaccinated population. Dashed line for a population where they are vaccinating first care homes then vulnerable population. Dashed line for doses separation of 3 weeks. Dash-dot line for doses separation of 12 weeks. Figures for Pfizer vaccine using Czech Republic conditions described in table 1.

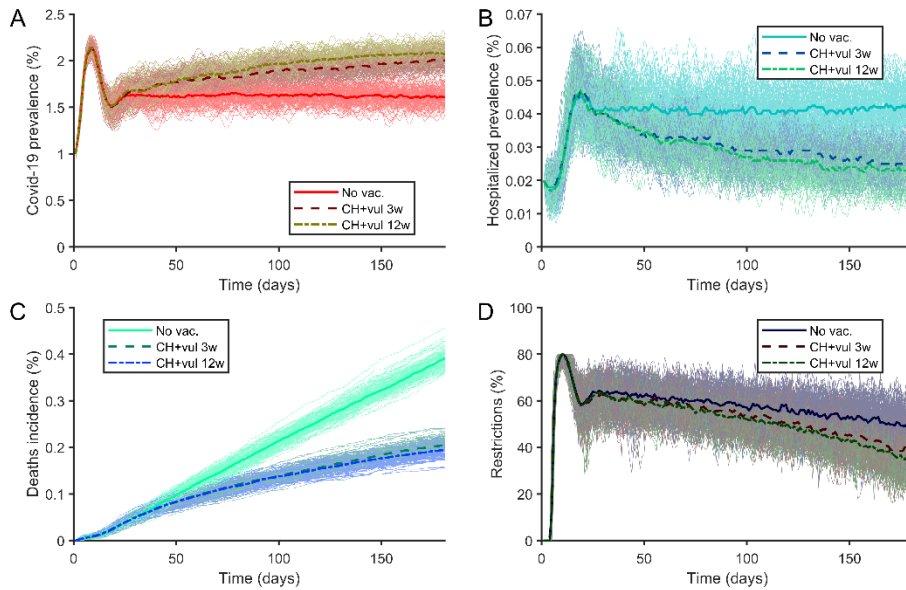

Figure 19. (A) Prevalence of covid-19 cases. (B) Prevalence of hospitalized covid-19 patients. (C) Covid-19 deaths. (D) Restrictions. Solid line for a non-vaccinated population. Dashed line for a population where they are vaccinating first care homes then vulnerable population. Dashed line for doses separation of 3 weeks. Dash-dot line for doses separation of 12 weeks. Figures for AstraZeneca vaccine using Denmark conditions described in table 1.

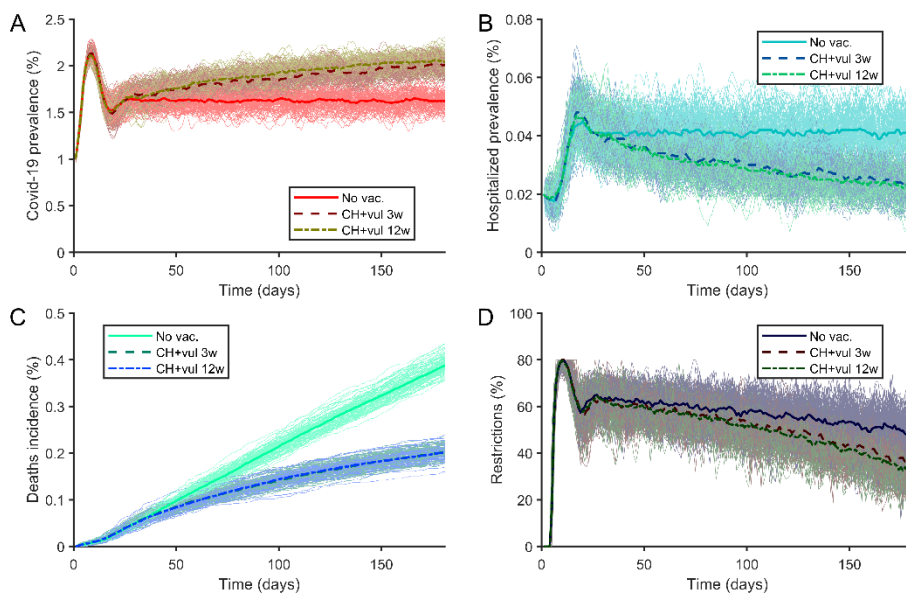

Figure 20. (A) Prevalence of covid-19 cases. (B) Prevalence of hospitalized covid-19 patients. (C) Covid-19 deaths. (D) Restrictions. Solid line for a non-vaccinated population. Dashed line for a population where they are vaccinating first care homes then vulnerable population. Dashed line for doses separation of 3 weeks. Dash-dot line for doses separation of 12 weeks. Figures for Moderna vaccine using Denmark conditions described in table 1.

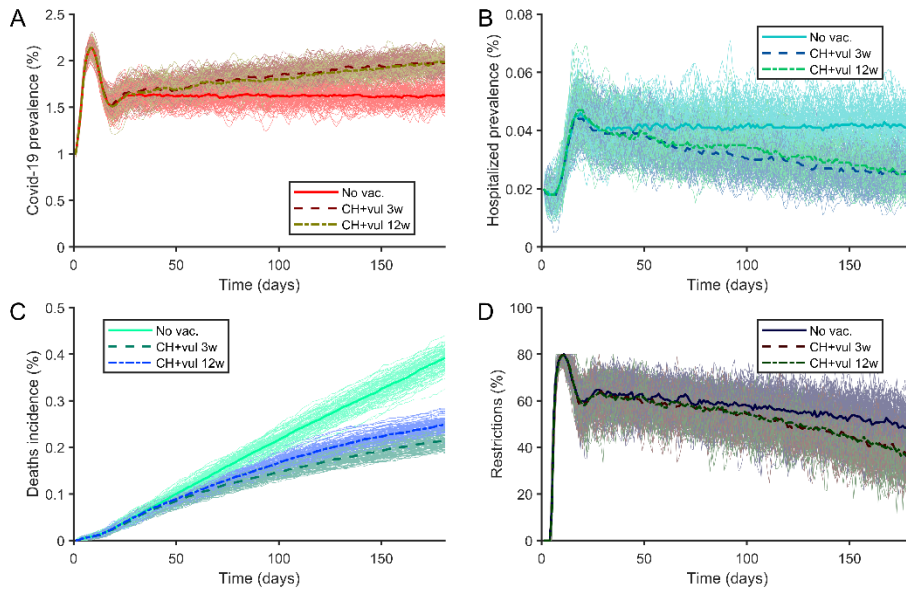

Figure 21. (A) Prevalence of covid-19 cases. (B) Prevalence of hospitalized covid-19 patients. (C) Covid-19 deaths. (D) Restrictions. Solid line for a non-vaccinated population. Dashed line for a population where they are vaccinating first care homes then vulnerable population. Dashed line for doses separation of 3 weeks. Dash-dot line for doses separation of 12 weeks. Figures for Pfizer vaccine using Denmark conditions described in table 1.

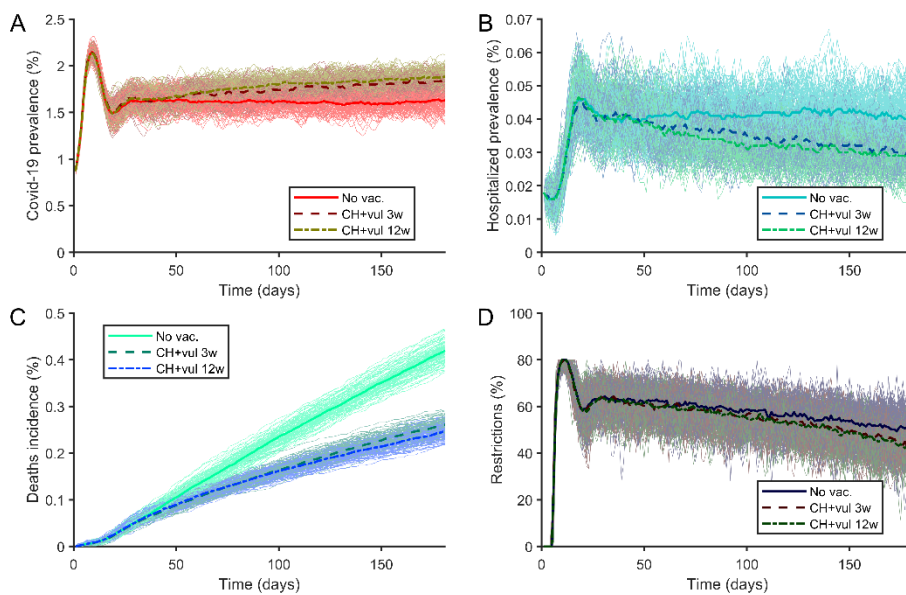

Figure 22. (A) Prevalence of covid-19 cases. (B) Prevalence of hospitalized covid-19 patients. (C) Covid-19 deaths. (D) Restrictions. Solid line for a non-vaccinated population. Dashed line for a population where they are vaccinating first care homes then vulnerable population. Dashed line for doses separation of 3 weeks. Dash-dot line for doses separation of 12 weeks. Figures for AstraZeneca vaccine using Estonia conditions described in table 1.

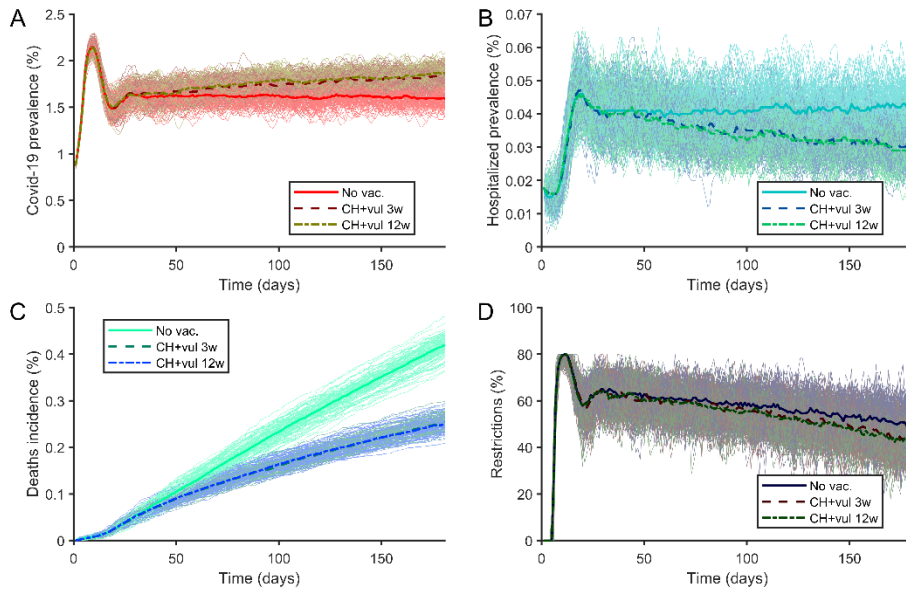

Figure 23. (A) Prevalence of covid-19 cases. (B) Prevalence of hospitalized covid-19 patients. (C) Covid-19 deaths. (D) Restrictions. Solid line for a non-vaccinated population. Dashed line for a population where they are vaccinating first care homes then vulnerable population. Dashed line for doses separation of 3 weeks. Dash-dot line for doses separation of 12 weeks. Figures for Moderna vaccine using Estonia conditions described in table 1.

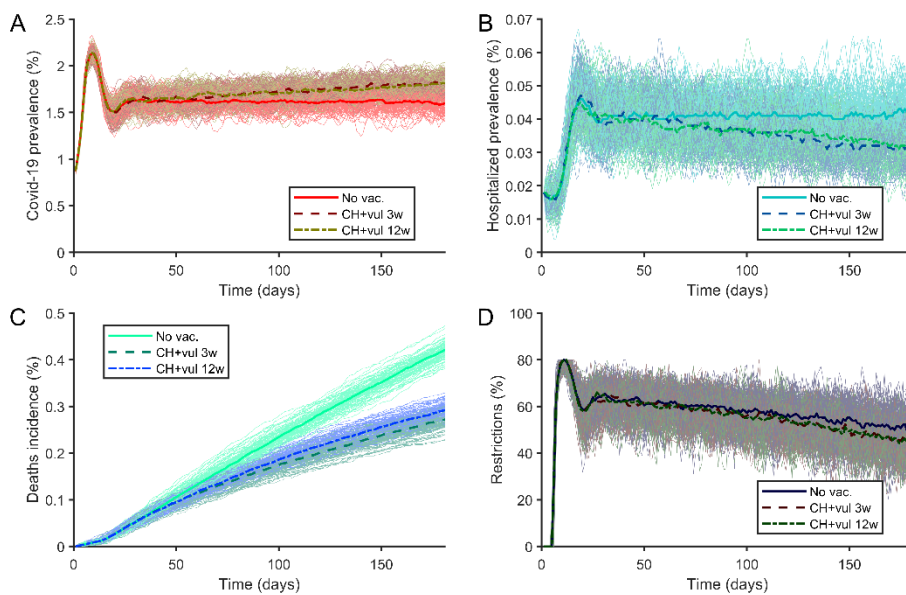

Figure 24. (A) Prevalence of covid-19 cases. (B) Prevalence of hospitalized covid-19 patients. (C) Covid-19 deaths. (D) Restrictions. Solid line for a non-vaccinated population. Dashed line for a population where they are vaccinating first care homes then vulnerable population. Dashed line for doses separation of 3 weeks. Dash-dot line for doses separation of 12 weeks. Figures for Pfizer vaccine using Estonia conditions described in table 1.

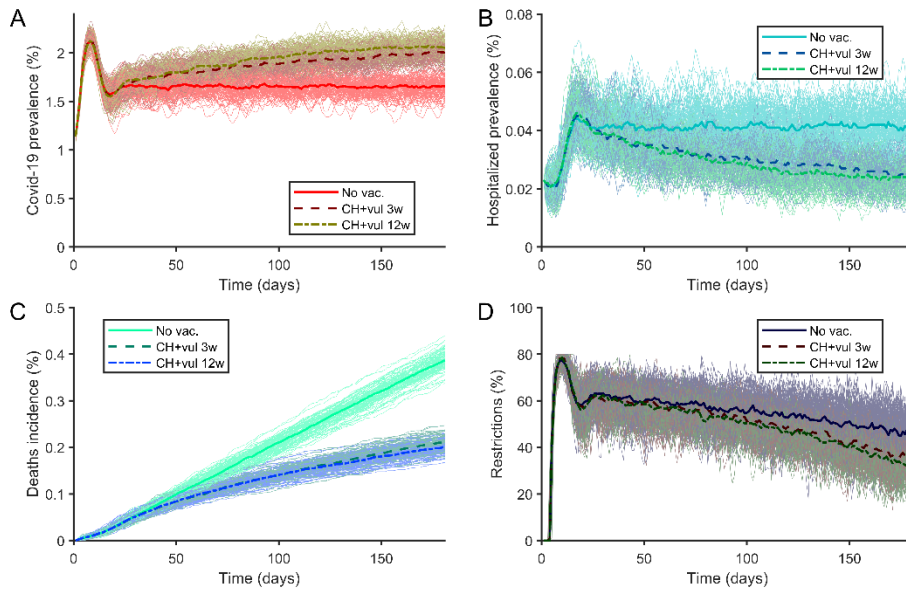

Figure 25. (A) Prevalence of covid-19 cases. (B) Prevalence of hospitalized covid-19 patients. (C) Covid-19 deaths. (D) Restrictions. Solid line for a non-vaccinated population. Dashed line for a population where they are vaccinating first care homes then vulnerable population. Dashed line for doses separation of 3 weeks. Dash-dot line for doses separation of 12 weeks. Figures for AstraZeneca vaccine using Europe conditions described in table 1.

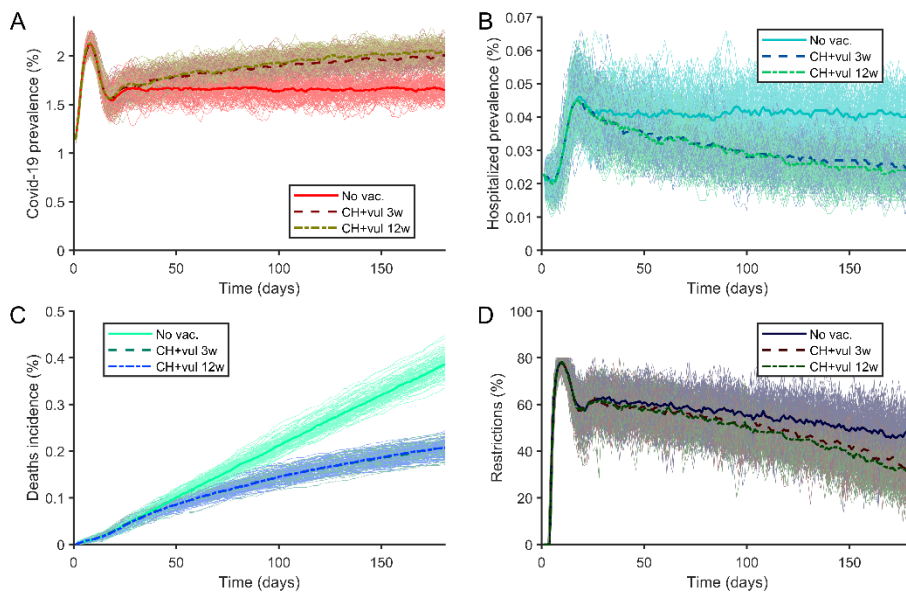

Figure 26. (A) Prevalence of covid-19 cases. (B) Prevalence of hospitalized covid-19 patients. (C) Covid-19 deaths. (D) Restrictions. Solid line for a non-vaccinated population. Dashed line for a population where they are vaccinating first care homes then vulnerable population. Dashed line for doses separation of 3 weeks. Dash-dot line for doses separation of 12 weeks. Figures for Moderna vaccine using Europe conditions described in table 1.

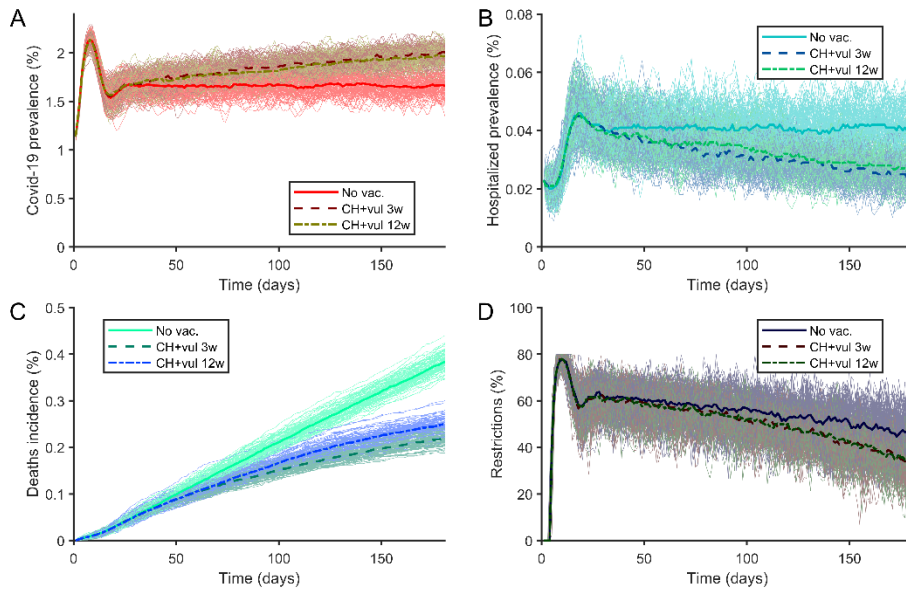

Figure 27. (A) Prevalence of covid-19 cases. (B) Prevalence of hospitalized covid-19 patients. (C) Covid-19 deaths. (D) Restrictions. Solid line for a non-vaccinated population. Dashed line for a population where they are vaccinating first care homes then vulnerable population. Dashed line for doses separation of 3 weeks. Dash-dot line for doses separation of 12 weeks. Figures for Pfizer vaccine using Europe conditions described in table 1.

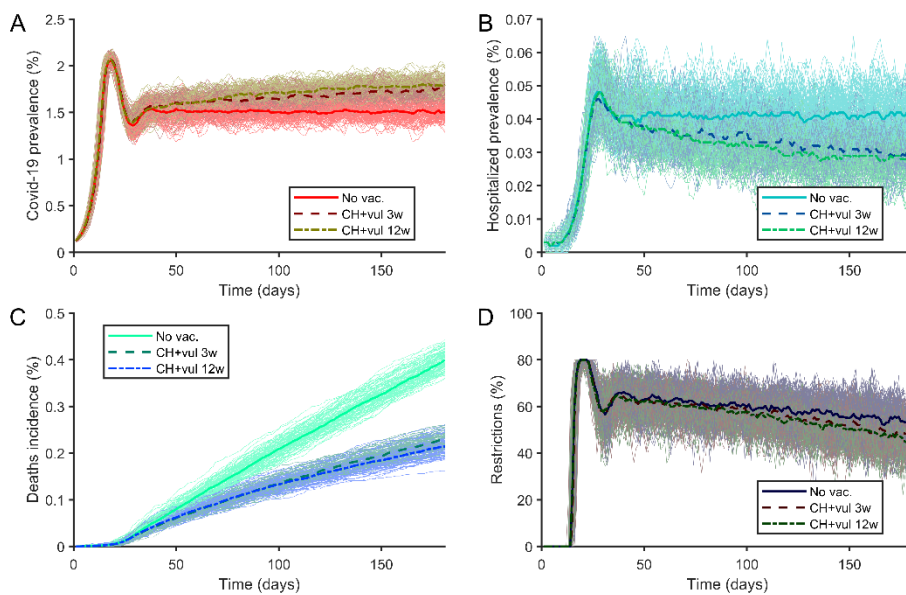

Figure 28. (A) Prevalence of covid-19 cases. (B) Prevalence of hospitalized covid-19 patients. (C) Covid-19 deaths. (D) Restrictions. Solid line for a non-vaccinated population. Dashed line for a population where they are vaccinating first care homes then vulnerable population. Dashed line for doses separation of 3 weeks. Dash-dot line for doses separation of 12 weeks. Figures for AstraZeneca vaccine using Finland conditions described in table 1.

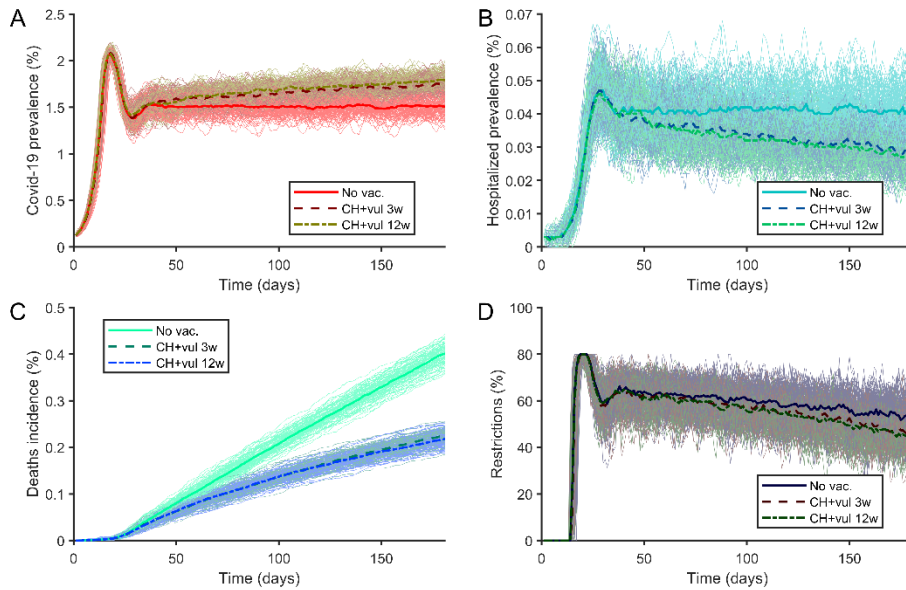

Figure 29. (A) Prevalence of covid-19 cases. (B) Prevalence of hospitalized covid-19 patients. (C) Covid-19 deaths. (D) Restrictions. Solid line for a non-vaccinated population. Dashed line for a population where they are vaccinating first care homes then vulnerable population. Dashed line for doses separation of 3 weeks. Dash-dot line for doses separation of 12 weeks. Figures for Moderna vaccine using Finland conditions described in table 1.

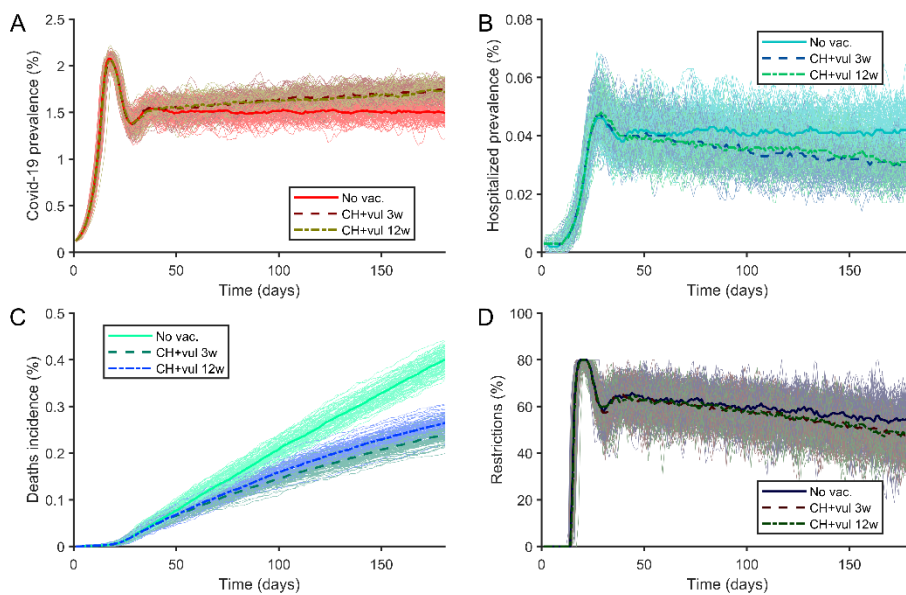

Figure 30. (A) Prevalence of covid-19 cases. (B) Prevalence of hospitalized covid-19 patients. (C) Covid-19 deaths. (D) Restrictions. Solid line for a non-vaccinated population. Dashed line for a population where they are vaccinating first care homes then vulnerable population. Dashed line for doses separation of 3 weeks. Dash-dot line for doses separation of 12 weeks. Figures for Pfizer vaccine using Finland conditions described in table 1.



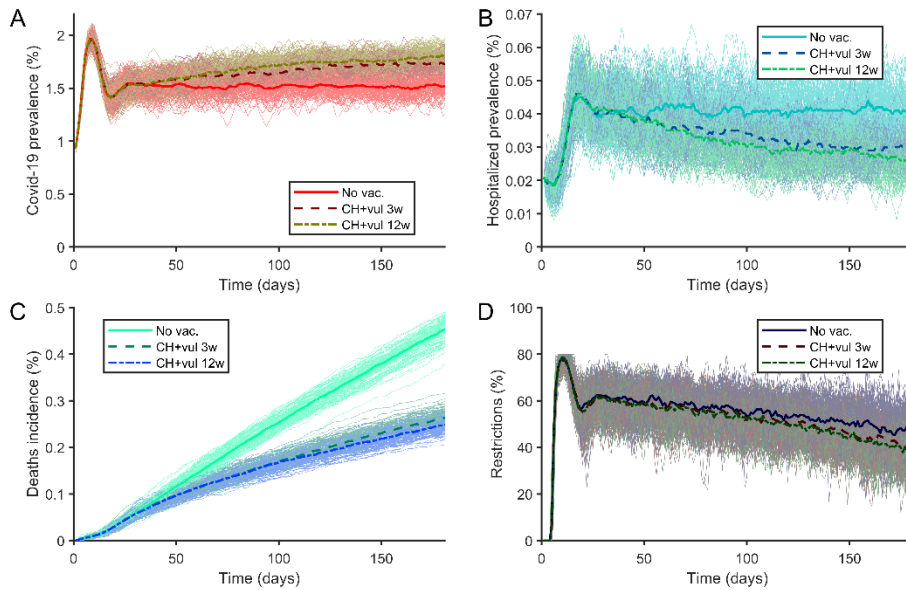

Figure 31. (A) Prevalence of covid-19 cases. (B) Prevalence of hospitalized covid-19 patients. (C) Covid-19 deaths. (D) Restrictions. Solid line for a non-vaccinated population. Dashed line for a population where they are vaccinating first care homes then vulnerable population. Dashed line for doses separation of 3 weeks. Dash-dot line for doses separation of 12 weeks. Figures for AstraZeneca vaccine using France conditions described in table 1.

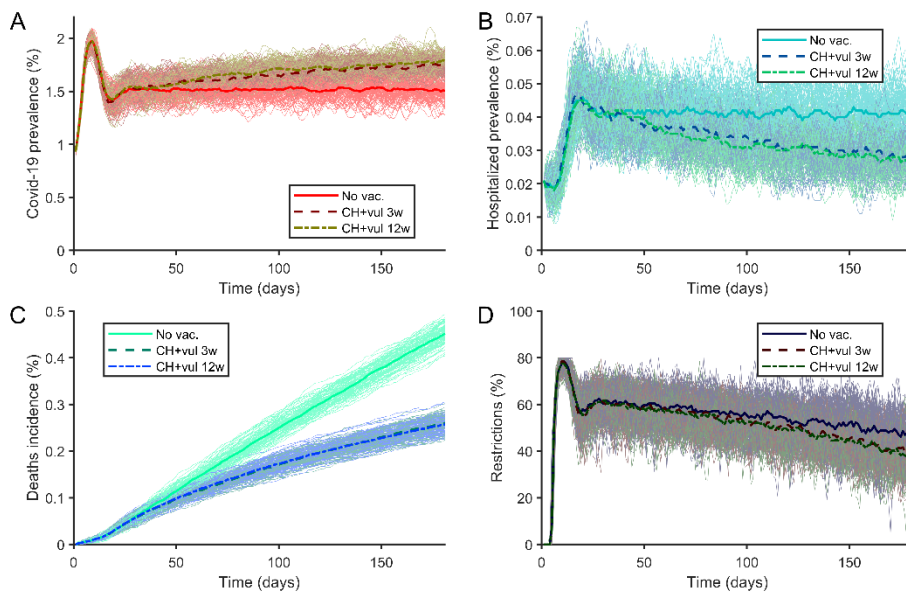

Figure 32. (A) Prevalence of covid-19 cases. (B) Prevalence of hospitalized covid-19 patients. (C) Covid-19 deaths. (D) Restrictions. Solid line for a non-vaccinated population. Dashed line for a population where they are vaccinating first care homes then vulnerable population. Dashed line for doses separation of 3 weeks. Dash-dot line for doses separation of 12 weeks. Figures for Moderna vaccine using France conditions described in table 1.

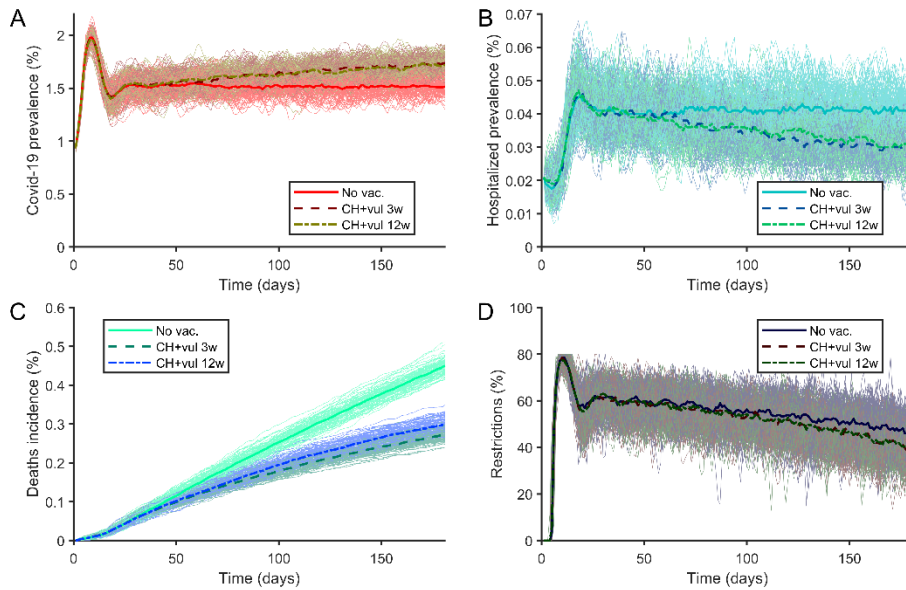

Figure 33. (A) Prevalence of covid-19 cases. (B) Prevalence of hospitalized covid-19 patients. (C) Covid-19 deaths. (D) Restrictions. Solid line for a non-vaccinated population. Dashed line for a population where they are vaccinating first care homes then vulnerable population. Dashed line for doses separation of 3 weeks. Dash-dot line for doses separation of 12 weeks. Figures for Pfizer vaccine using France conditions described in table 1.

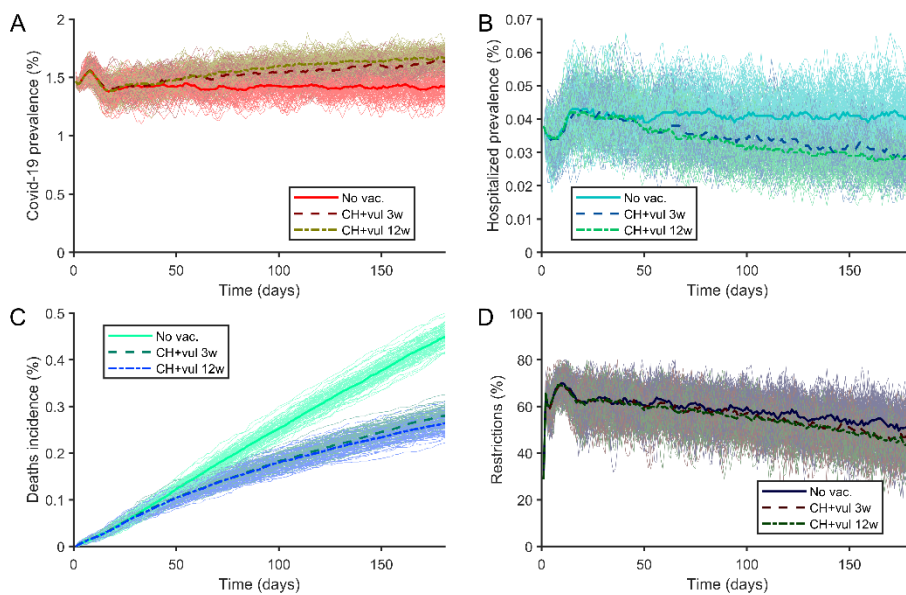

Figure 34. (A) Prevalence of covid-19 cases. (B) Prevalence of hospitalized covid-19 patients. (C) Covid-19 deaths. (D) Restrictions. Solid line for a non-vaccinated population. Dashed line for a population where they are vaccinating first care homes then vulnerable population. Dashed line for doses separation of 3 weeks. Dash-dot line for doses separation of 12 weeks. Figures for AstraZeneca vaccine using Germany conditions described in table 1.

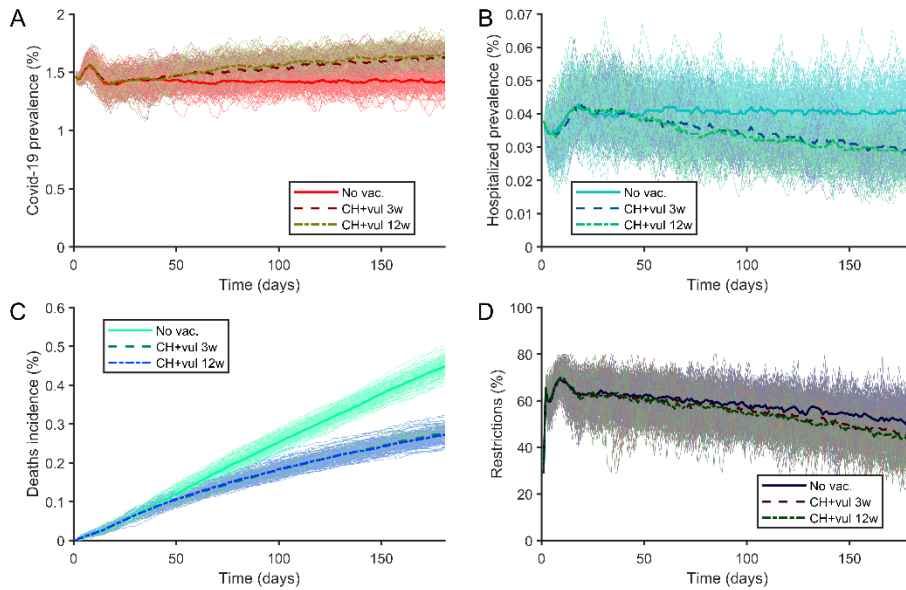

Figure 35. (A) Prevalence of covid-19 cases. (B) Prevalence of hospitalized covid-19 patients. (C) Covid-19 deaths. (D) Restrictions. Solid line for a non-vaccinated population. Dashed line for a population where they are vaccinating first care homes then vulnerable population. Dashed line for doses separation of 3 weeks. Dash-dot line for doses separation of 12 weeks. Figures for Moderna vaccine using Germany conditions described in table 1.

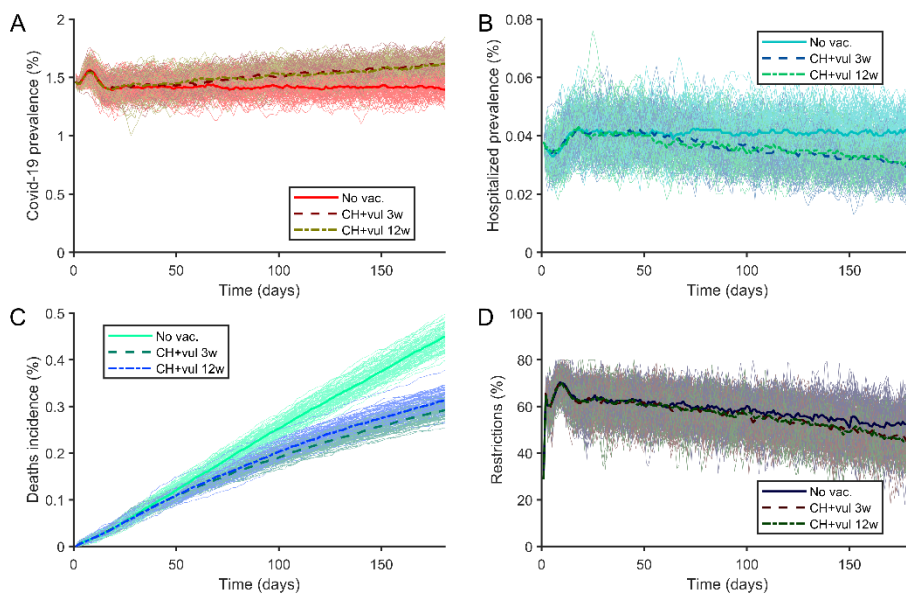

Figure 36. (A) Prevalence of covid-19 cases. (B) Prevalence of hospitalized covid-19 patients. (C) Covid-19 deaths. (D) Restrictions. Solid line for a non-vaccinated population. Dashed line for a population where they are vaccinating first care homes then vulnerable population. Dashed line for doses separation of 3 weeks. Dash-dot line for doses separation of 12 weeks. Figures for Pfizer vaccine using Germany conditions described in table 1.

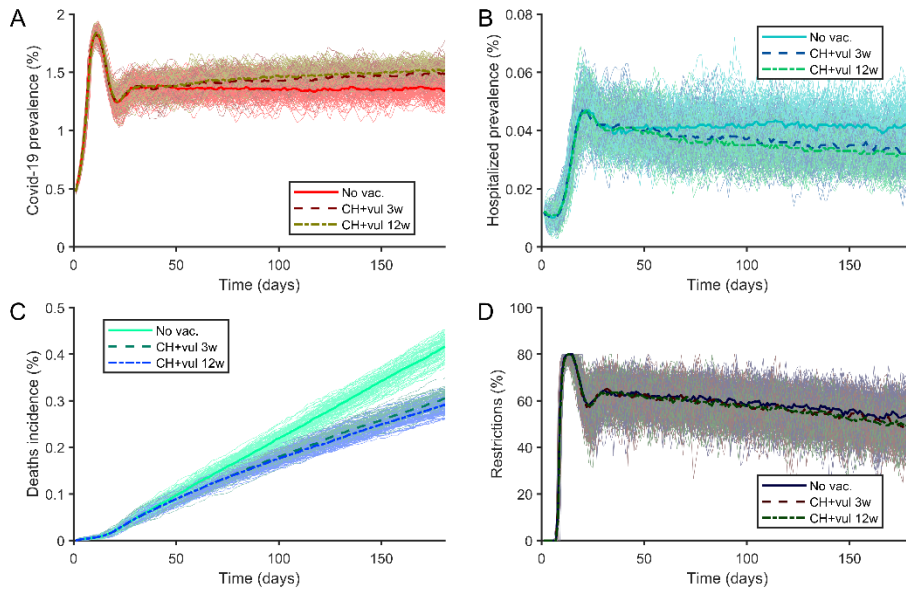

Figure 37. (A) Prevalence of covid-19 cases. (B) Prevalence of hospitalized covid-19 patients. (C) Covid-19 deaths. (D) Restrictions. Solid line for a non-vaccinated population. Dashed line for a population where they are vaccinating first care homes then vulnerable population. Dashed line for doses separation of 3 weeks. Dash-dot line for doses separation of 12 weeks. Figures for AstraZeneca vaccine using Greece conditions described in table 1.

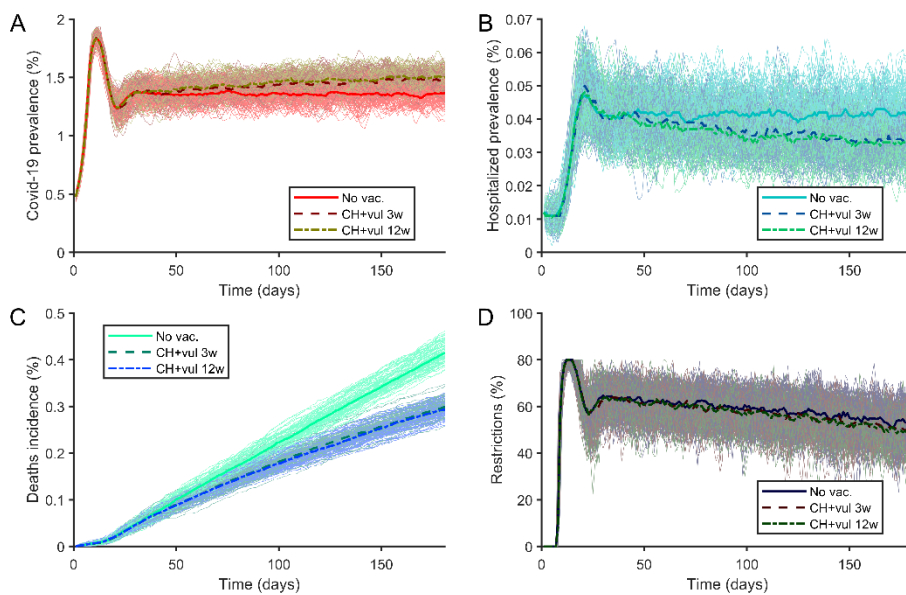

Figure 38. (A) Prevalence of covid-19 cases. (B) Prevalence of hospitalized covid-19 patients. (C) Covid-19 deaths. (D) Restrictions. Solid line for a non-vaccinated population. Dashed line for a population where they are vaccinating first care homes then vulnerable population. Dashed line for doses separation of 3 weeks. Dash-dot line for doses separation of 12 weeks. Figures for Moderna vaccine using Greece conditions described in table 1.

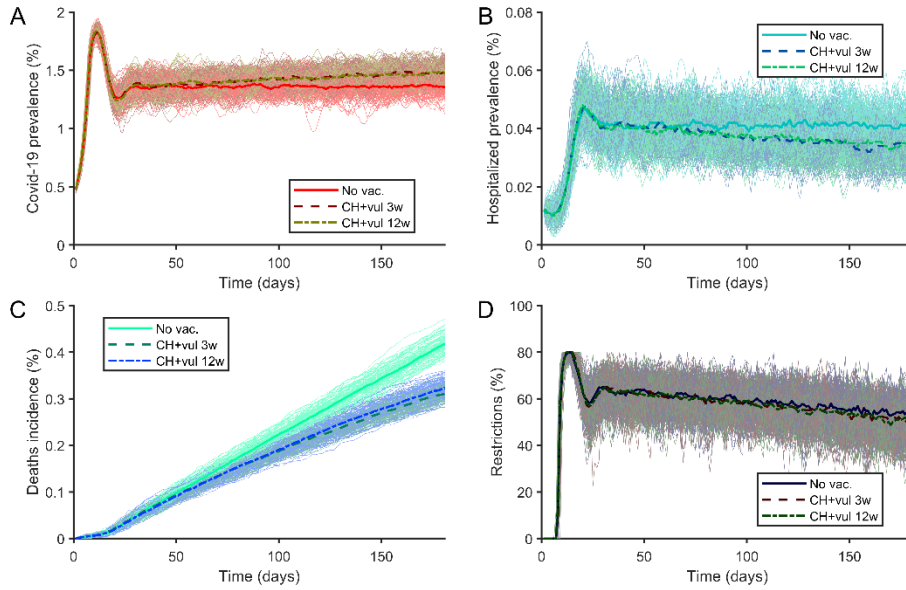

Figure 39. (A) Prevalence of covid-19 cases. (B) Prevalence of hospitalized covid-19 patients. (C) Covid-19 deaths. (D) Restrictions. Solid line for a non-vaccinated population. Dashed line for a population where they are vaccinating first care homes then vulnerable population. Dashed line for doses separation of 3 weeks. Dash-dot line for doses separation of 12 weeks. Figures for Pfizer vaccine using Greece conditions described in table 1.

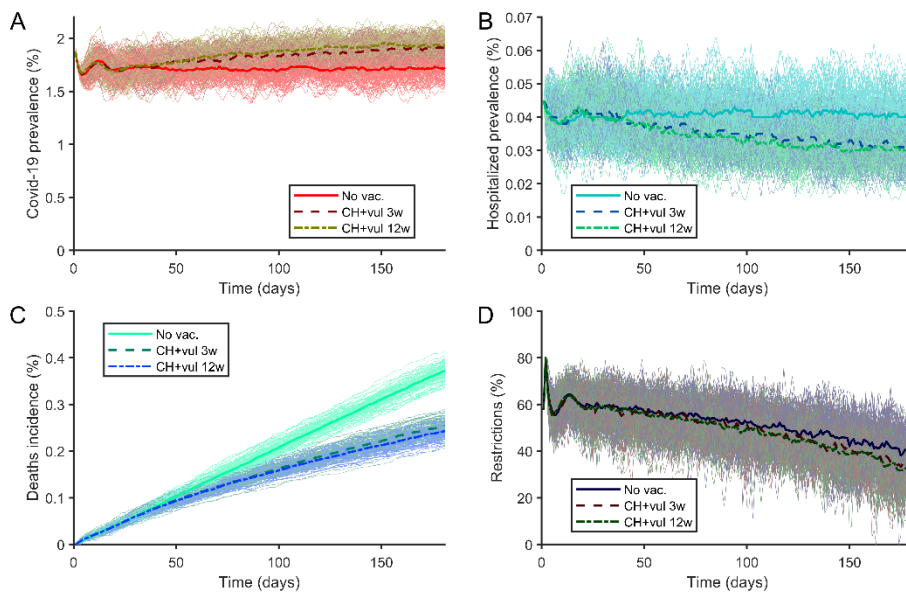

Figure 40. (A) Prevalence of covid-19 cases. (B) Prevalence of hospitalized covid-19 patients. (C) Covid-19 deaths. (D) Restrictions. Solid line for a non-vaccinated population. Dashed line for a population where they are vaccinating first care homes then vulnerable population. Dashed line for doses separation of 3 weeks. Dash-dot line for doses separation of 12 weeks. Figures for AstraZeneca vaccine using Hungary conditions described in table 1.

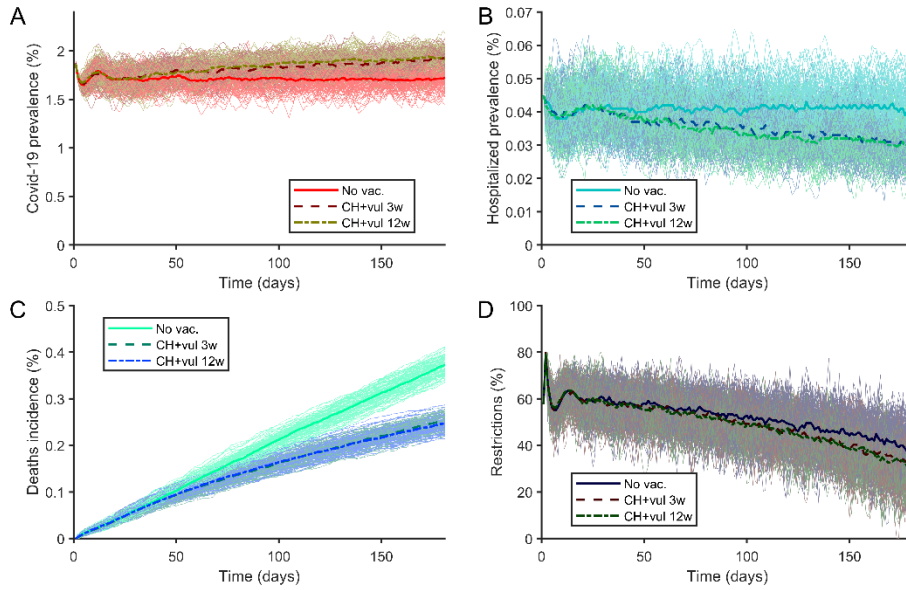

Figure 41. (A) Prevalence of covid-19 cases. (B) Prevalence of hospitalized covid-19 patients. (C) Covid-19 deaths. (D) Restrictions. Solid line for a non-vaccinated population. Dashed line for a population where they are vaccinating first care homes then vulnerable population. Dashed line for doses separation of 3 weeks. Dash-dot line for doses separation of 12 weeks. Figures for Moderna vaccine using Hungary conditions described in table 1.

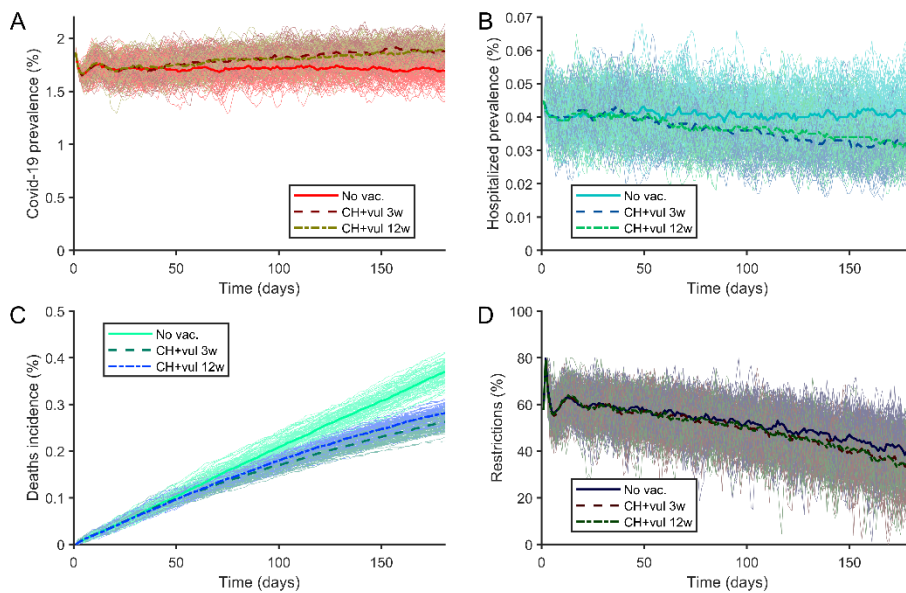

Figure 42. (A) Prevalence of covid-19 cases. (B) Prevalence of hospitalized covid-19 patients. (C) Covid-19 deaths. (D) Restrictions. Solid line for a non-vaccinated population. Dashed line for a population where they are vaccinating first care homes then vulnerable population. Dashed line for doses separation of 3 weeks. Dash-dot line for doses separation of 12 weeks. Figures for Pfizer vaccine using Hungary conditions described in table 1.

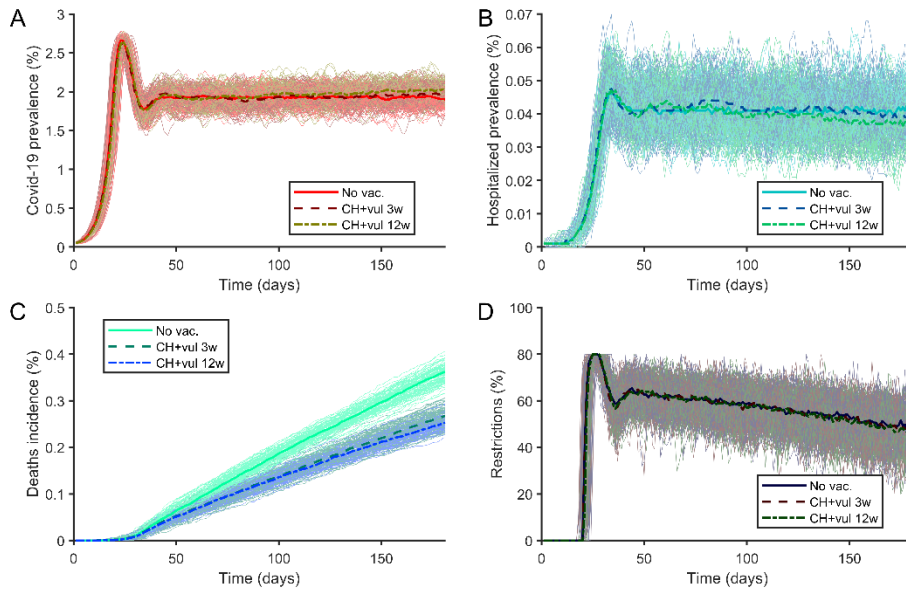

Figure 43. (A) Prevalence of covid-19 cases. (B) Prevalence of hospitalized covid-19 patients. (C) Covid-19 deaths. (D) Restrictions. Solid line for a non-vaccinated population. Dashed line for a population where they are vaccinating first care homes then vulnerable population. Dashed line for doses separation of 3 weeks. Dash-dot line for doses separation of 12 weeks. Figures for AstraZeneca vaccine using Iceland conditions described in table 1.

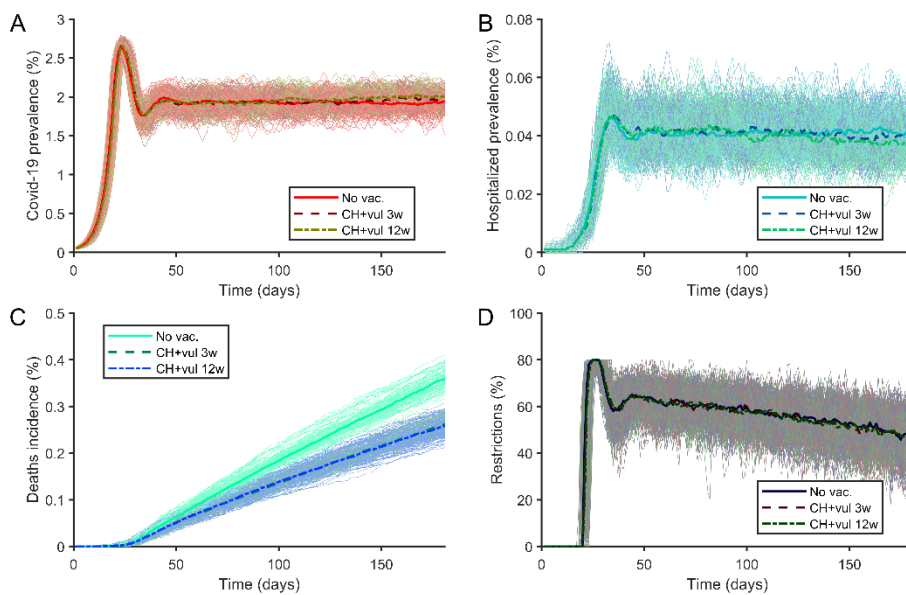

Figure 44. (A) Prevalence of covid-19 cases. (B) Prevalence of hospitalized covid-19 patients. (C) Covid-19 deaths. (D) Restrictions. Solid line for a non-vaccinated population. Dashed line for a population where they are vaccinating first care homes then vulnerable population. Dashed line for doses separation of 3 weeks. Dash-dot line for doses separation of 12 weeks. Figures for Moderna vaccine using Iceland conditions described in table 1.

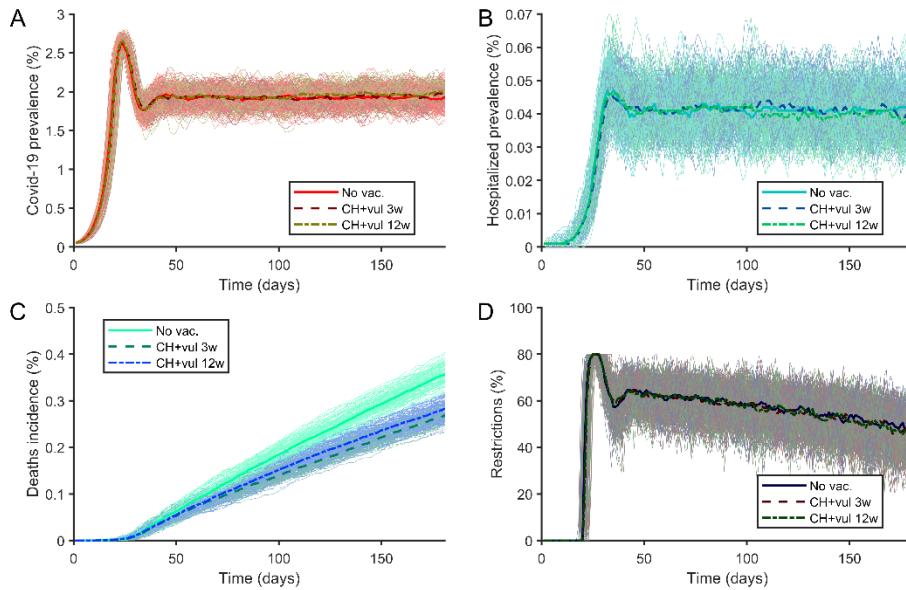

Figure 45. (A) Prevalence of covid-19 cases. (B) Prevalence of hospitalized covid-19 patients. (C) Covid-19 deaths. (D) Restrictions. Solid line for a non-vaccinated population. Dashed line for a population where they are vaccinating first care homes then vulnerable population. Dashed line for doses separation of 3 weeks. Dash-dot line for doses separation of 12 weeks. Figures for Pfizer vaccine using Iceland conditions described in table 1.

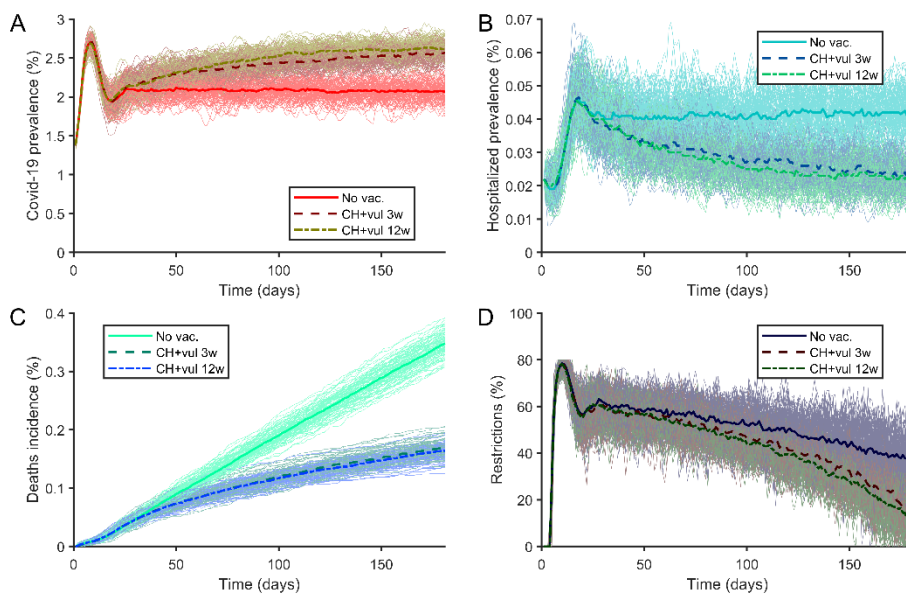

Figure 46. (A) Prevalence of covid-19 cases. (B) Prevalence of hospitalized covid-19 patients. (C) Covid-19 deaths. (D) Restrictions. Solid line for a non-vaccinated population. Dashed line for a population where they are vaccinating first care homes then vulnerable population. Dashed line for doses separation of 3 weeks. Dash-dot line for doses separation of 12 weeks. Figures for AstraZeneca vaccine using Ireland conditions described in table 1.



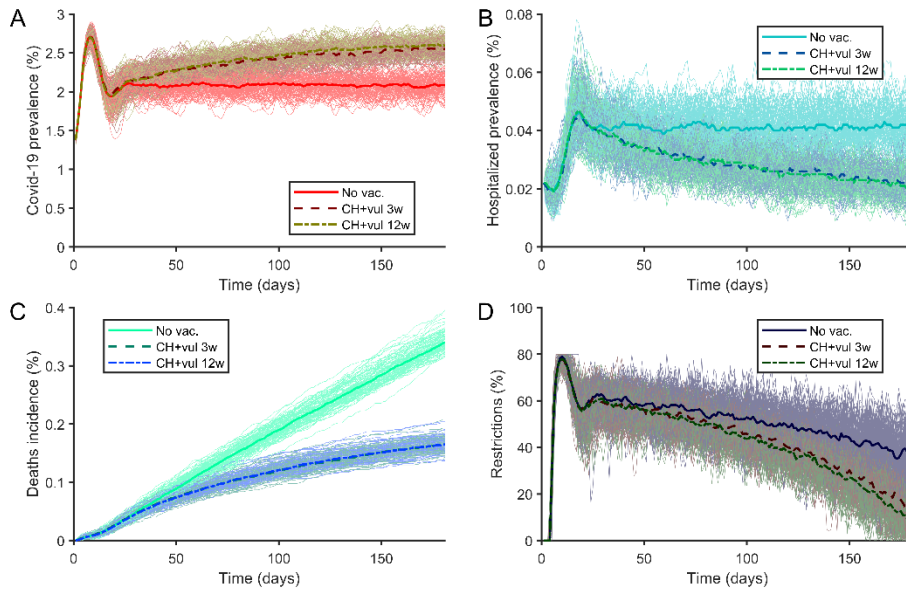

Figure 47. (A) Prevalence of covid-19 cases. (B) Prevalence of hospitalized covid-19 patients. (C) Covid-19 deaths. (D) Restrictions. Solid line for a non-vaccinated population. Dashed line for a population where they are vaccinating first care homes then vulnerable population. Dashed line for doses separation of 3 weeks. Dash-dot line for doses separation of 12 weeks. Figures for Moderna vaccine using Ireland conditions described in table 1.

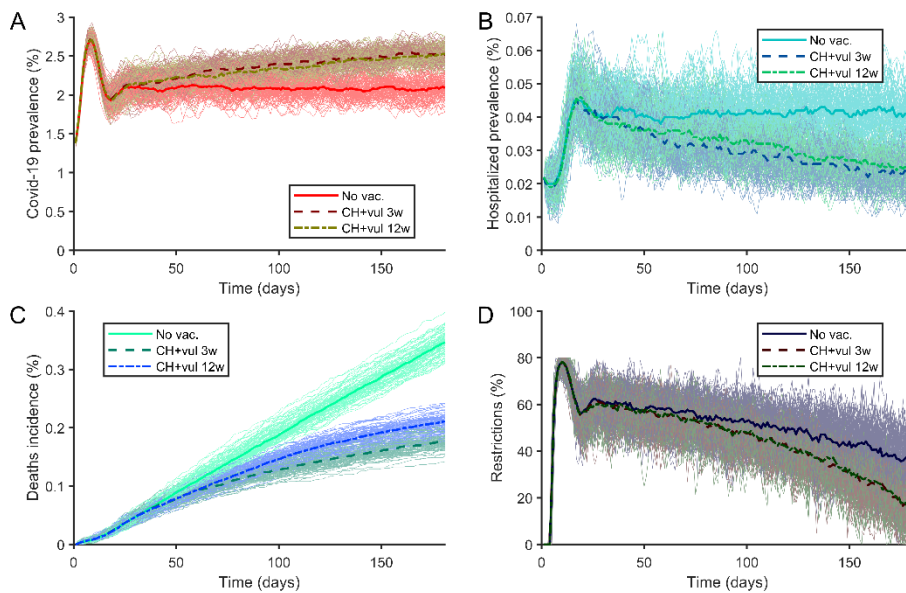

Figure 48. (A) Prevalence of covid-19 cases. (B) Prevalence of hospitalized covid-19 patients. (C) Covid-19 deaths. (D) Restrictions. Solid line for a non-vaccinated population. Dashed line for a population where they are vaccinating first care homes then vulnerable population. Dashed line for doses separation of 3 weeks. Dash-dot line for doses separation of 12 weeks. Figures for Pfizer vaccine using Ireland conditions described in table 1.

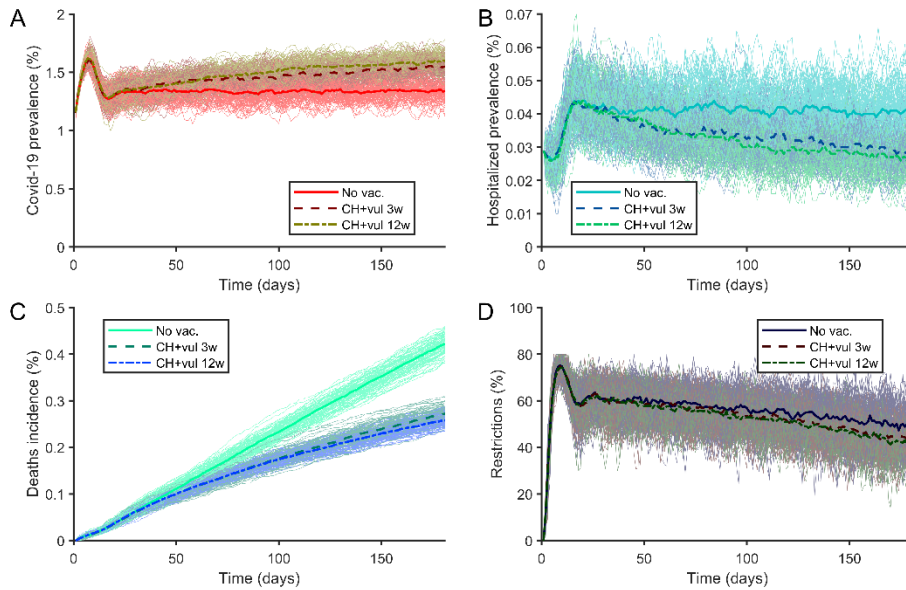

Figure 49. (A) Prevalence of covid-19 cases. (B) Prevalence of hospitalized covid-19 patients. (C) Covid-19 deaths. (D) Restrictions. Solid line for a non-vaccinated population. Dashed line for a population where they are vaccinating first care homes then vulnerable population. Dashed line for doses separation of 3 weeks. Dash-dot line for doses separation of 12 weeks. Figures for AstraZeneca vaccine using Italy conditions described in table 1.

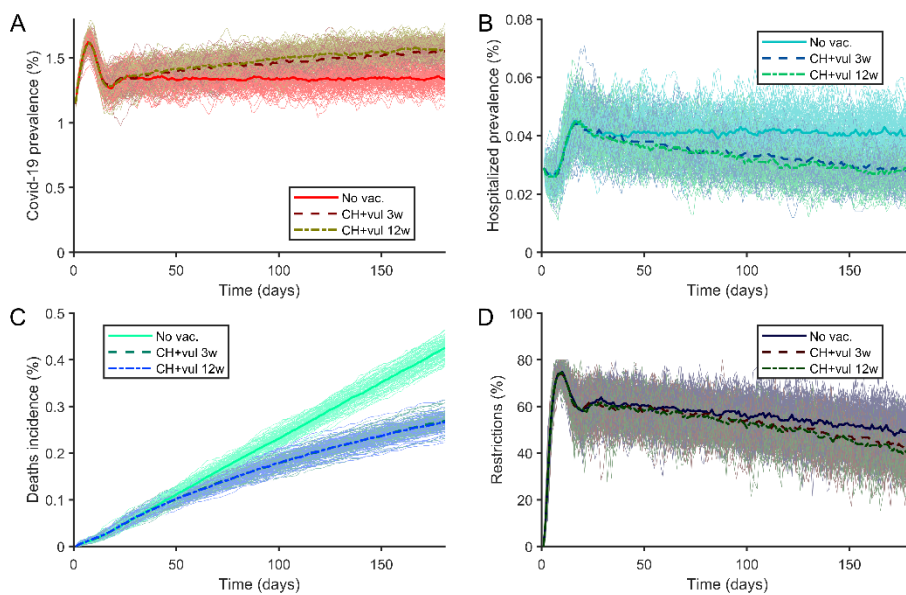

Figure 50. (A) Prevalence of covid-19 cases. (B) Prevalence of hospitalized covid-19 patients. (C) Covid-19 deaths. (D) Restrictions. Solid line for a non-vaccinated population. Dashed line for a population where they are vaccinating first care homes then vulnerable population. Dashed line for doses separation of 3 weeks. Dash-dot line for doses separation of 12 weeks. Figures for Moderna vaccine using Italy conditions described in table 1.

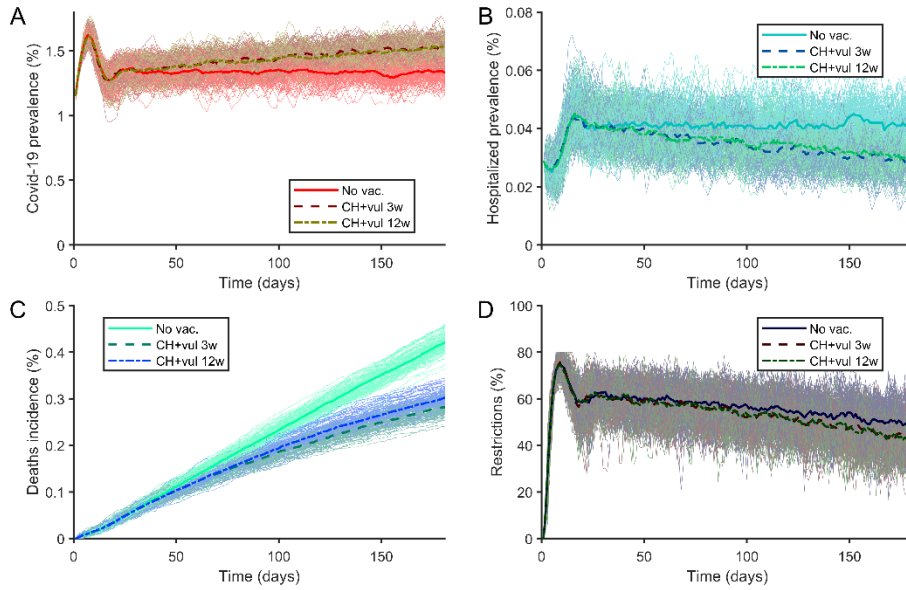

Figure 51. (A) Prevalence of covid-19 cases. (B) Prevalence of hospitalized covid-19 patients. (C) Covid-19 deaths. (D) Restrictions. Solid line for a non-vaccinated population. Dashed line for a population where they are vaccinating first care homes then vulnerable population. Dashed line for doses separation of 3 weeks. Dash-dot line for doses separation of 12 weeks. Figures for Pfizer vaccine using Italy conditions described in table 1.

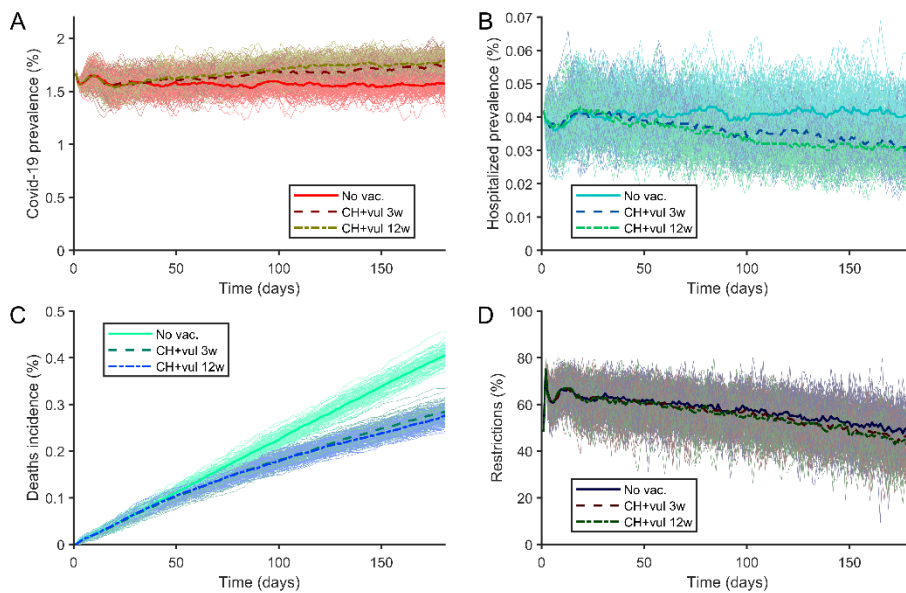

Figure 52. (A) Prevalence of covid-19 cases. (B) Prevalence of hospitalized covid-19 patients. (C) Covid-19 deaths. (D) Restrictions. Solid line for a non-vaccinated population. Dashed line for a population where they are vaccinating first care homes then vulnerable population. Dashed line for doses separation of 3 weeks. Dash-dot line for doses separation of 12 weeks. Figures for AstraZeneca vaccine using Latvia conditions described in table 1.

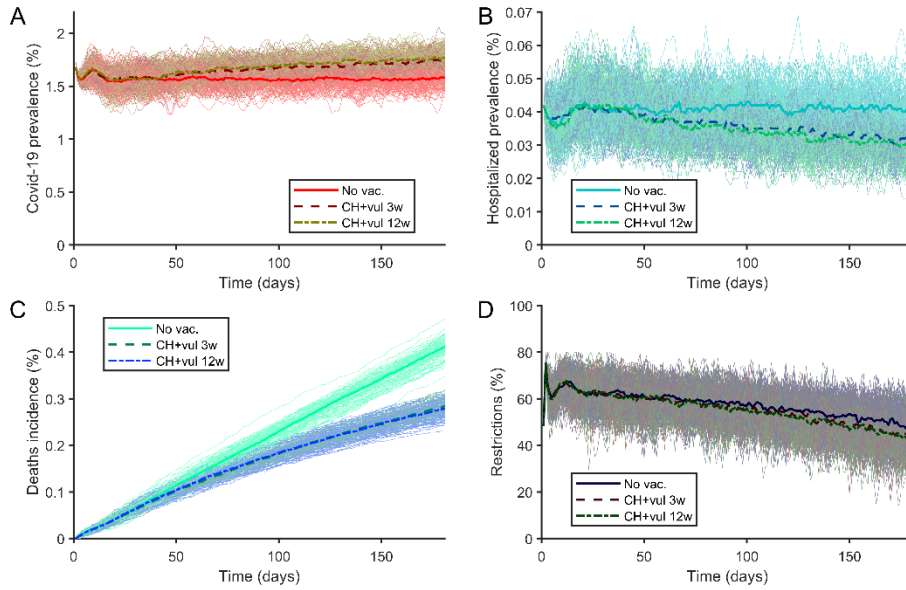

Figure 53. (A) Prevalence of covid-19 cases. (B) Prevalence of hospitalized covid-19 patients. (C) Covid-19 deaths. (D) Restrictions. Solid line for a non-vaccinated population. Dashed line for a population where they are vaccinating first care homes then vulnerable population. Dashed line for doses separation of 3 weeks. Dash-dot line for doses separation of 12 weeks. Figures for Moderna vaccine using Latvia conditions described in table 1.

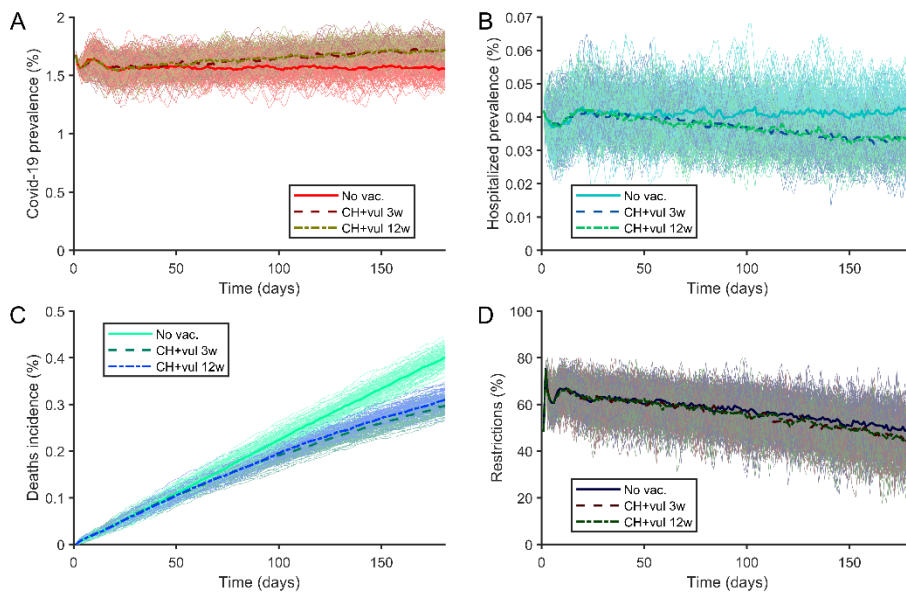

Figure 54. (A) Prevalence of covid-19 cases. (B) Prevalence of hospitalized covid-19 patients. (C) Covid-19 deaths. (D) Restrictions. Solid line for a non-vaccinated population. Dashed line for a population where they are vaccinating first care homes then vulnerable population. Dashed line for doses separation of 3 weeks. Dash-dot line for doses separation of 12 weeks. Figures for Pfizer vaccine using Latvia conditions described in table 1.

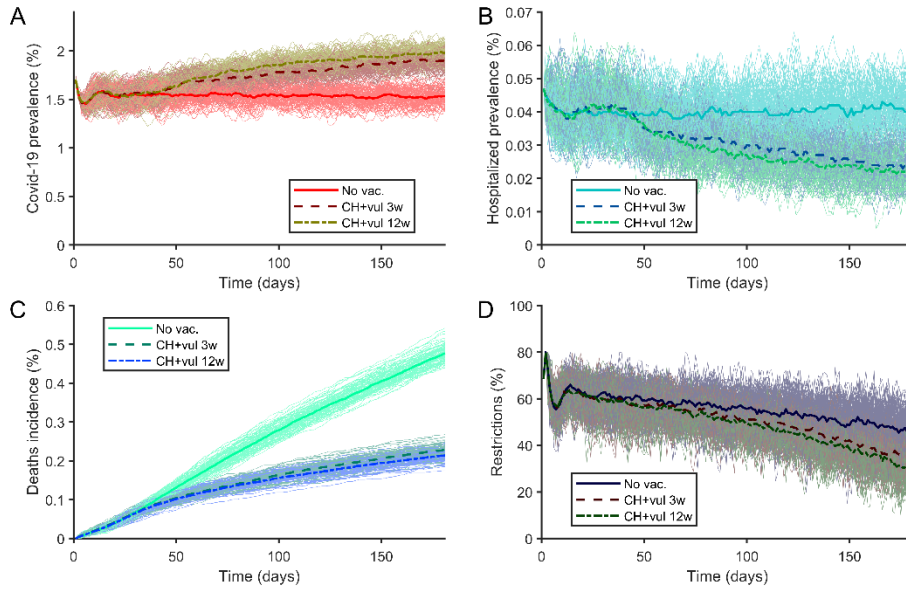

Figure 55. (A) Prevalence of covid-19 cases. (B) Prevalence of hospitalized covid-19 patients. (C) Covid-19 deaths. (D) Restrictions. Solid line for a non-vaccinated population. Dashed line for a population where they are vaccinating first care homes then vulnerable population. Dashed line for doses separation of 3 weeks. Dash-dot line for doses separation of 12 weeks. Figures for AstraZeneca vaccine using Lithuania conditions described in table 1.

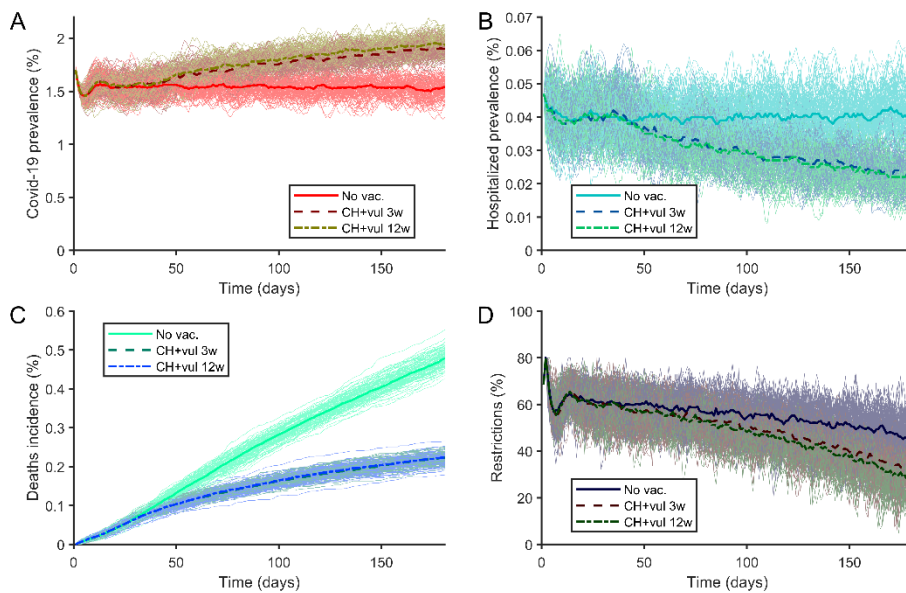

Figure 56. (A) Prevalence of covid-19 cases. (B) Prevalence of hospitalized covid-19 patients. (C) Covid-19 deaths. (D) Restrictions. Solid line for a non-vaccinated population. Dashed line for a population where they are vaccinating first care homes then vulnerable population. Dashed line for doses separation of 3 weeks. Dash-dot line for doses separation of 12 weeks. Figures for Moderna vaccine using Lithuania conditions described in table 1.

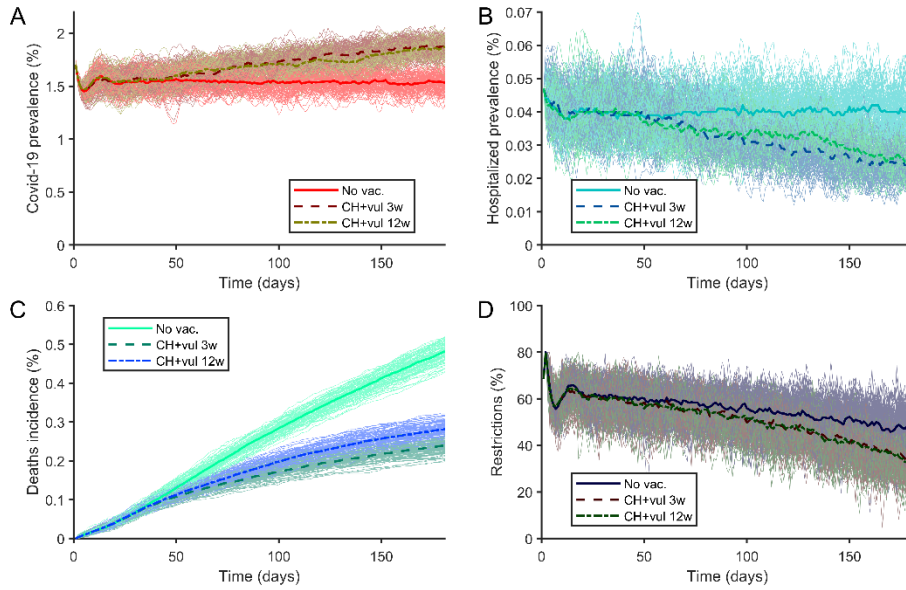

Figure 57. (A) Prevalence of covid-19 cases. (B) Prevalence of hospitalized covid-19 patients. (C) Covid-19 deaths. (D) Restrictions. Solid line for a non-vaccinated population. Dashed line for a population where they are vaccinating first care homes then vulnerable population. Dashed line for doses separation of 3 weeks. Dash-dot line for doses separation of 12 weeks. Figures for Pfizer vaccine using Lithuania conditions described in table 1.

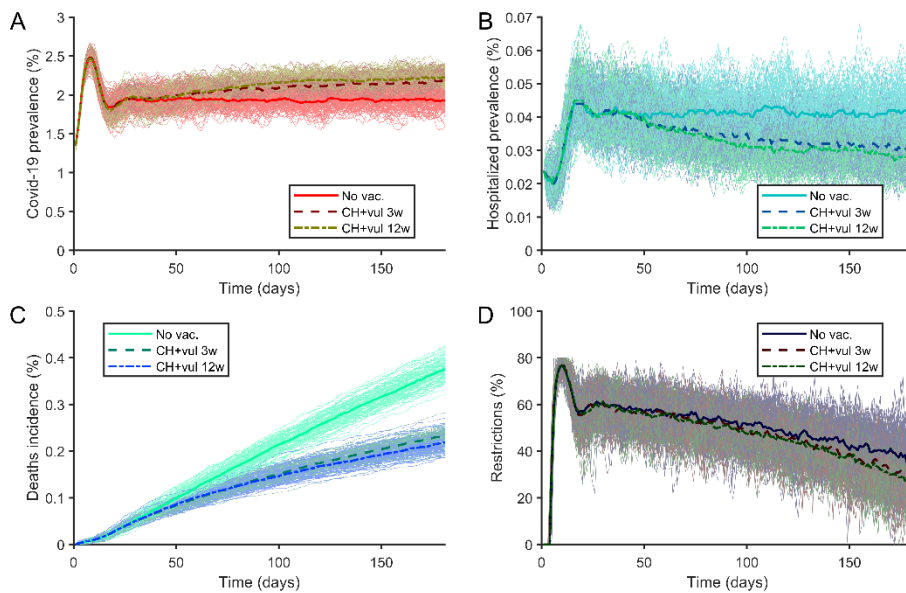

Figure 58. (A) Prevalence of covid-19 cases. (B) Prevalence of hospitalized covid-19 patients. (C) Covid-19 deaths. (D) Restrictions. Solid line for a non-vaccinated population. Dashed line for a population where they are vaccinating first care homes then vulnerable population. Dashed line for doses separation of 3 weeks. Dash-dot line for doses separation of 12 weeks. Figures for AstraZeneca vaccine using Luxembourg conditions described in table 1.

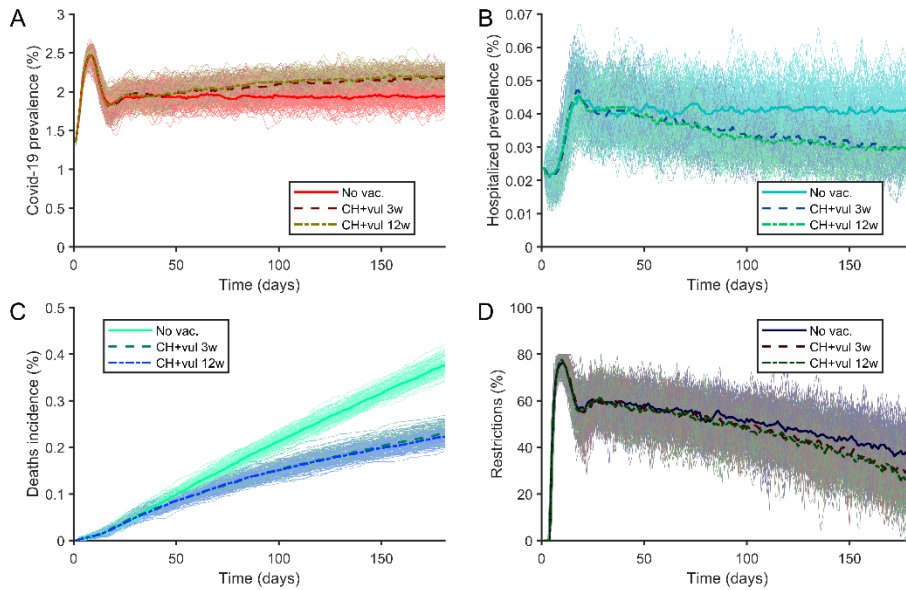

Figure 59. (A) Prevalence of covid-19 cases. (B) Prevalence of hospitalized covid-19 patients. (C) Covid-19 deaths. (D) Restrictions. Solid line for a non-vaccinated population. Dashed line for a population where they are vaccinating first care homes then vulnerable population. Dashed line for doses separation of 3 weeks. Dash-dot line for doses separation of 12 weeks. Figures for Moderna vaccine using Luxembourg conditions described in table 1.

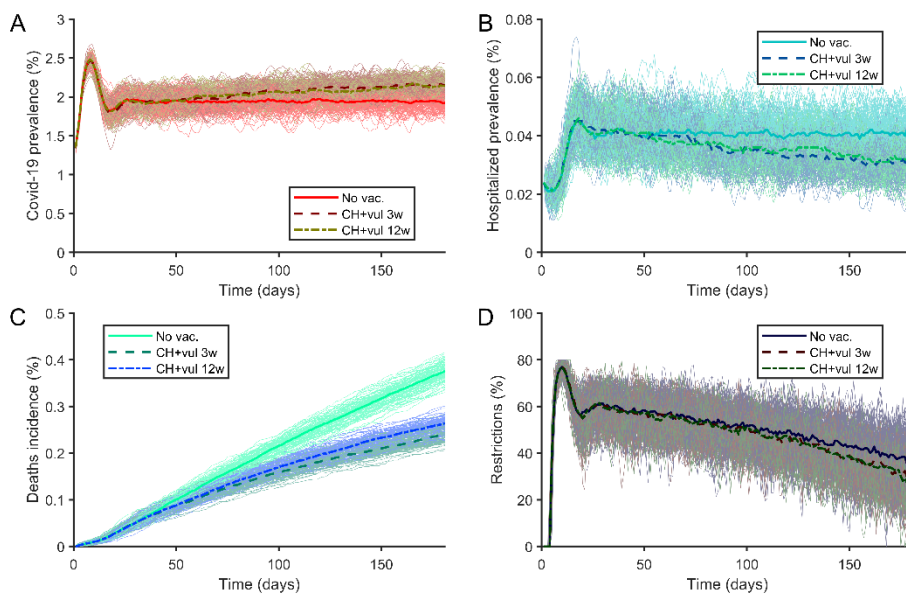

Figure 60. (A) Prevalence of covid-19 cases. (B) Prevalence of hospitalized covid-19 patients. (C) Covid-19 deaths. (D) Restrictions. Solid line for a non-vaccinated population. Dashed line for a population where they are vaccinating first care homes then vulnerable population. Dashed line for doses separation of 3 weeks. Dash-dot line for doses separation of 12 weeks. Figures for Pfizer vaccine using Luxembourg conditions described in table 1.

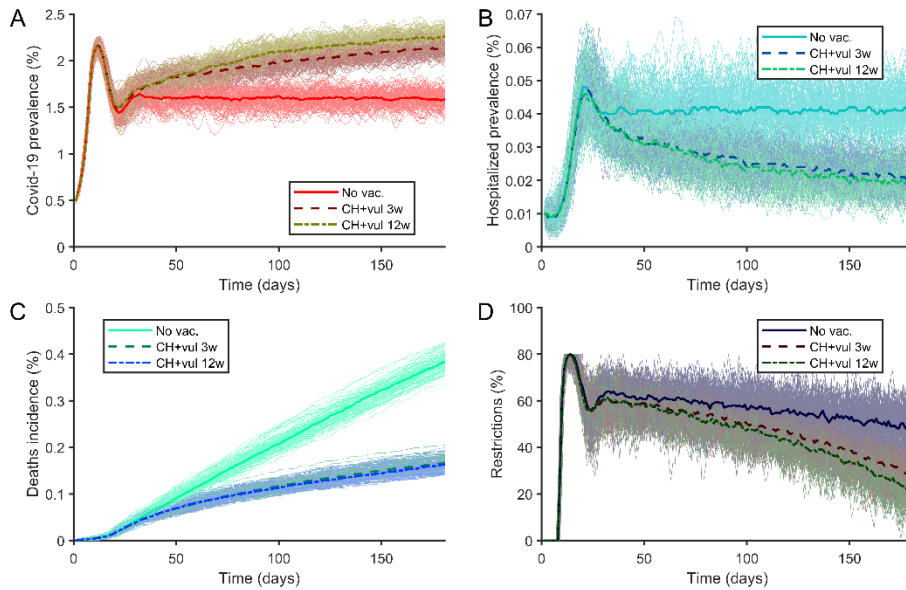

Figure 61. (A) Prevalence of covid-19 cases. (B) Prevalence of hospitalized covid-19 patients. (C) Covid-19 deaths. (D) Restrictions. Solid line for a non-vaccinated population. Dashed line for a population where they are vaccinating first care homes then vulnerable population. Dashed line for doses separation of 3 weeks. Dash-dot line for doses separation of 12 weeks. Figures for AstraZeneca vaccine using Malta conditions described in table 1.

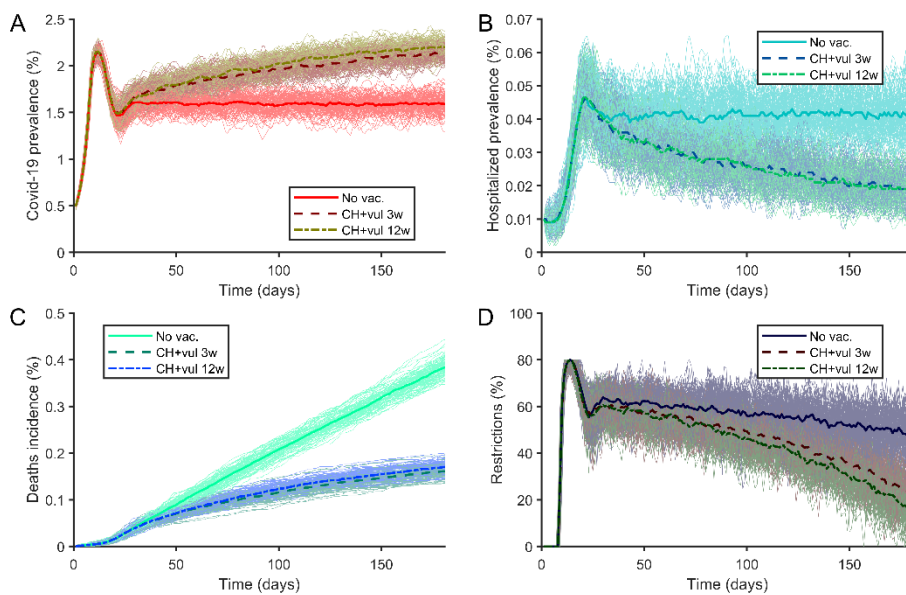

Figure 62. (A) Prevalence of covid-19 cases. (B) Prevalence of hospitalized covid-19 patients. (C) Covid-19 deaths. (D) Restrictions. Solid line for a non-vaccinated population. Dashed line for a population where they are vaccinating first care homes then vulnerable population. Dashed line for doses separation of 3 weeks. Dash-dot line for doses separation of 12 weeks. Figures for Moderna vaccine using Malta conditions described in table 1.



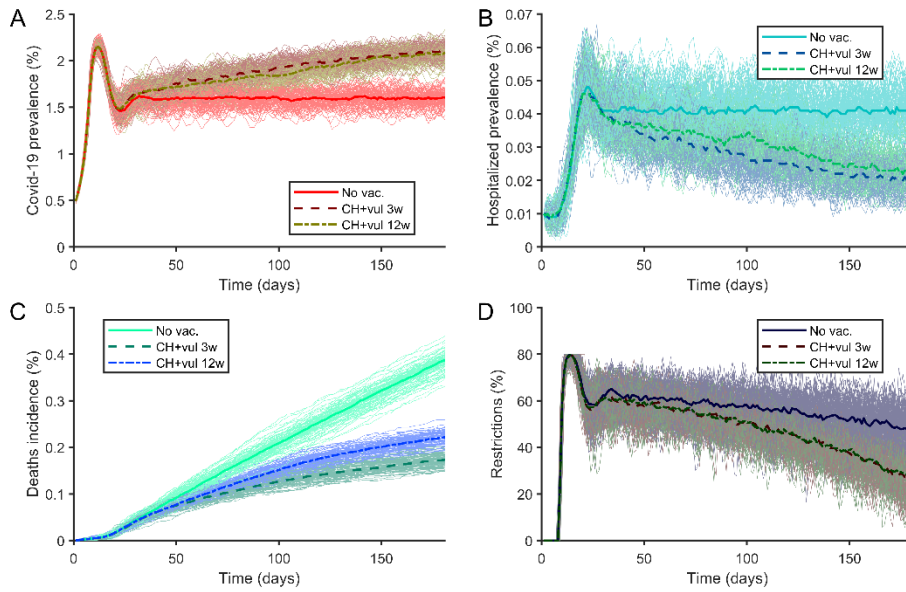

Figure 63. (A) Prevalence of covid-19 cases. (B) Prevalence of hospitalized covid-19 patients. (C) Covid-19 deaths. (D) Restrictions. Solid line for a non-vaccinated population. Dashed line for a population where they are vaccinating first care homes then vulnerable population. Dashed line for doses separation of 3 weeks. Dash-dot line for doses separation of 12 weeks. Figures for Pfizer vaccine using Malta conditions described in table 1.

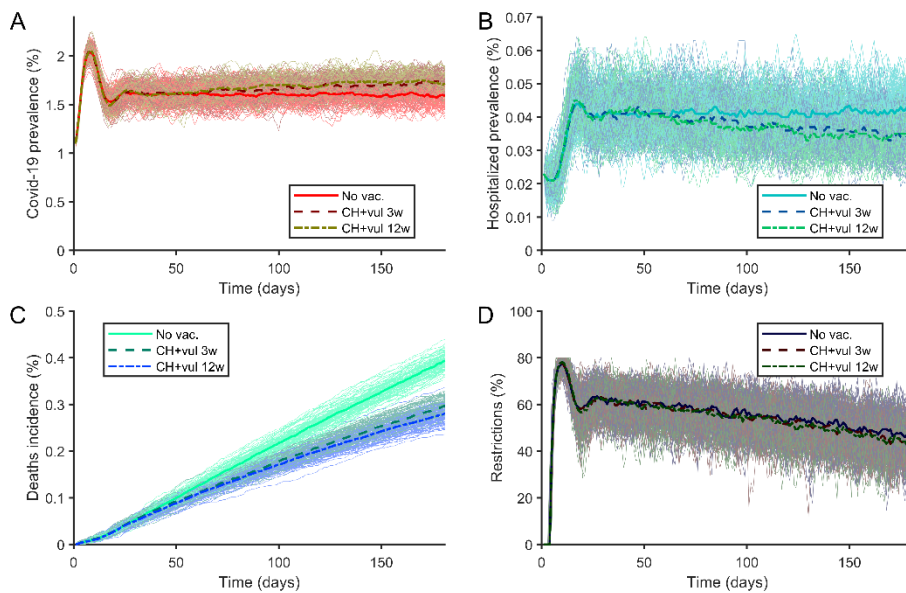

Figure 64. (A) Prevalence of covid-19 cases. (B) Prevalence of hospitalized covid-19 patients. (C) Covid-19 deaths. (D) Restrictions. Solid line for a non-vaccinated population. Dashed line for a population where they are vaccinating first care homes then vulnerable population. Dashed line for doses separation of 3 weeks. Dash-dot line for doses separation of 12 weeks. Figures for AstraZeneca vaccine using Netherlands conditions described in table 1.

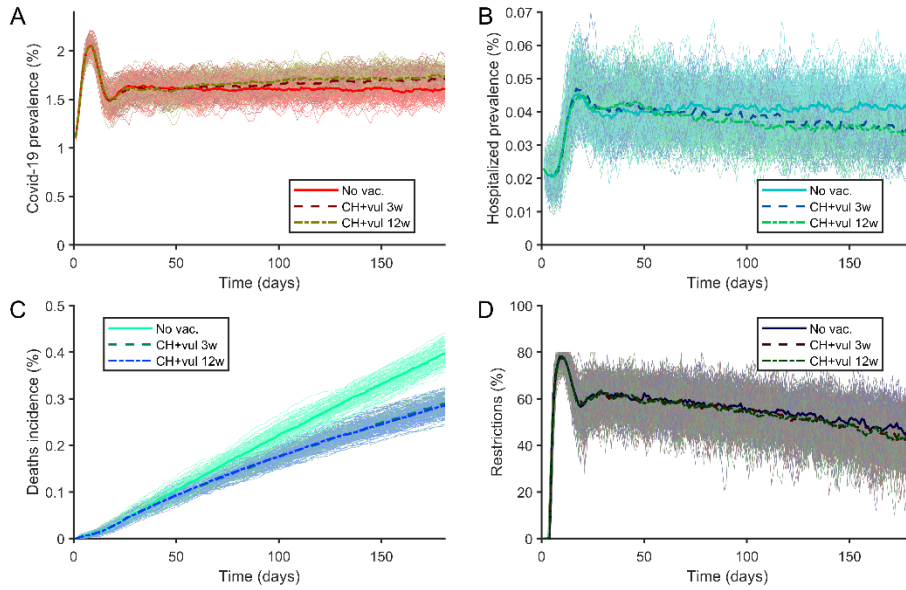

Figure 65. (A) Prevalence of covid-19 cases. (B) Prevalence of hospitalized covid-19 patients. (C) Covid-19 deaths. (D) Restrictions. Solid line for a non-vaccinated population. Dashed line for a population where they are vaccinating first care homes then vulnerable population. Dashed line for doses separation of 3 weeks. Dash-dot line for doses separation of 12 weeks. Figures for Moderna vaccine using Netherlands conditions described in table 1.

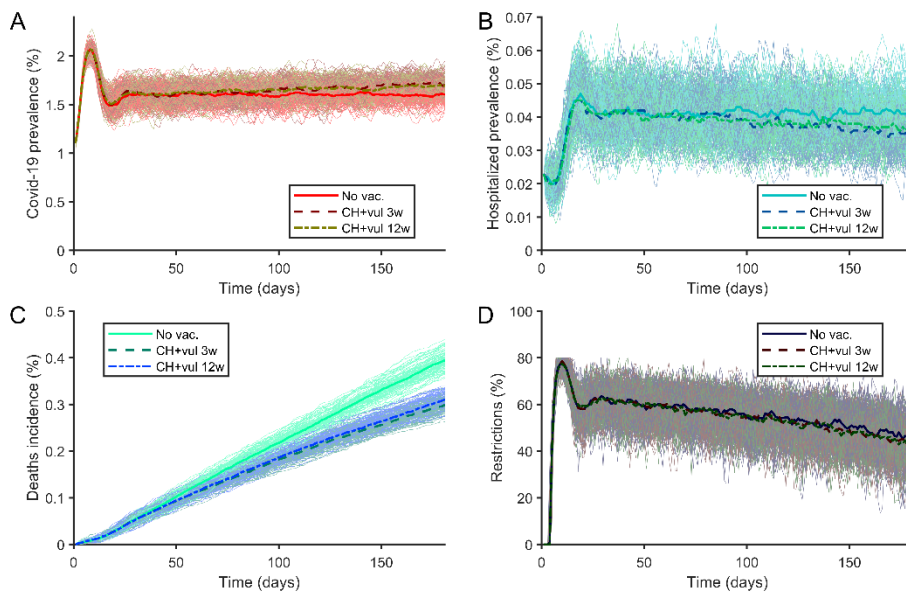

Figure 66. (A) Prevalence of covid-19 cases. (B) Prevalence of hospitalized covid-19 patients. (C) Covid-19 deaths. (D) Restrictions. Solid line for a non-vaccinated population. Dashed line for a population where they are vaccinating first care homes then vulnerable population. Dashed line for doses separation of 3 weeks. Dash-dot line for doses separation of 12 weeks. Figures for Pfizer vaccine using Netherlands conditions described in table 1.

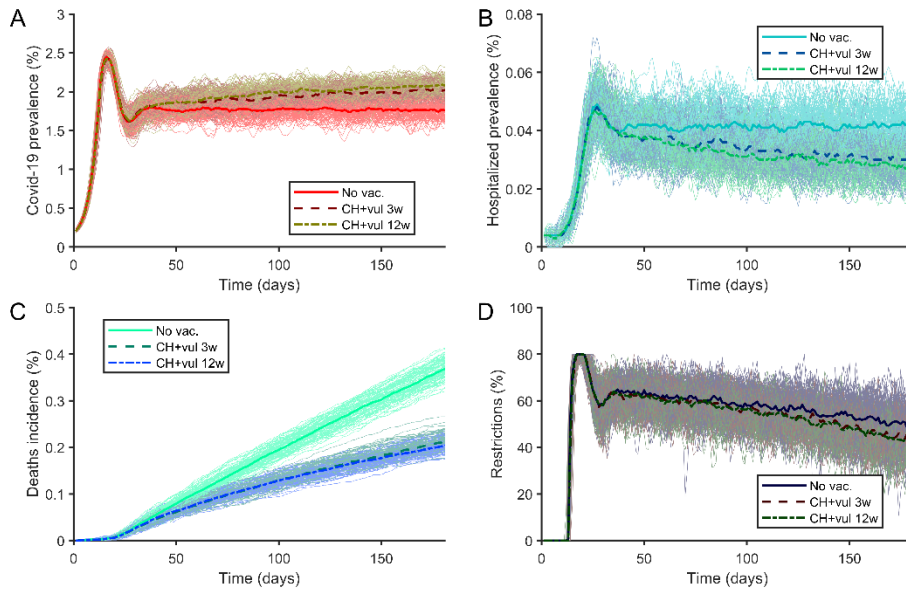

Figure 67. (A) Prevalence of covid-19 cases. (B) Prevalence of hospitalized covid-19 patients. (C) Covid-19 deaths. (D) Restrictions. Solid line for a non-vaccinated population. Dashed line for a population where they are vaccinating first care homes then vulnerable population. Dashed line for doses separation of 3 weeks. Dash-dot line for doses separation of 12 weeks. Figures for AstraZeneca vaccine using Norway conditions described in table 1.

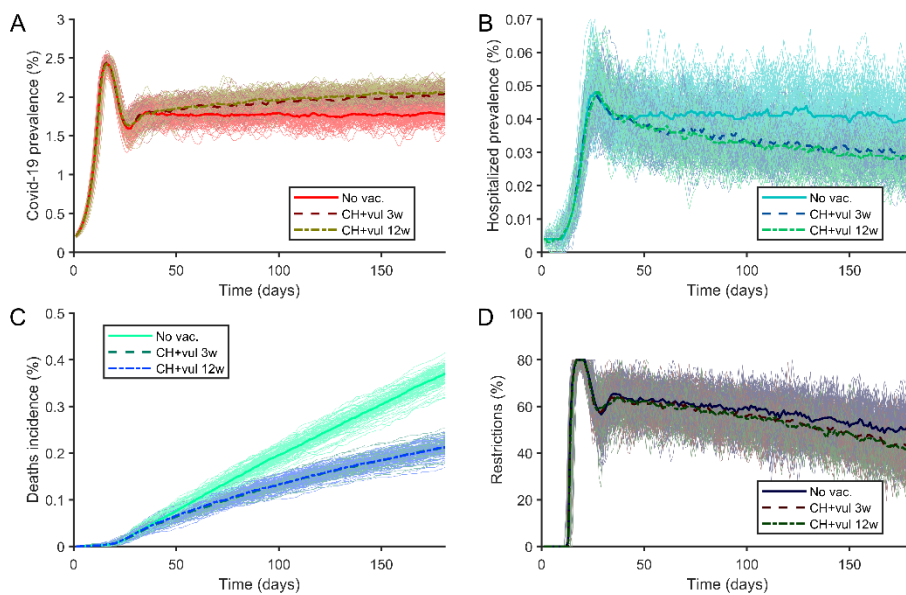

Figure 68. (A) Prevalence of covid-19 cases. (B) Prevalence of hospitalized covid-19 patients. (C) Covid-19 deaths. (D) Restrictions. Solid line for a non-vaccinated population. Dashed line for a population where they are vaccinating first care homes then vulnerable population. Dashed line for doses separation of 3 weeks. Dash-dot line for doses separation of 12 weeks. Figures for Moderna vaccine using Norway conditions described in table 1.

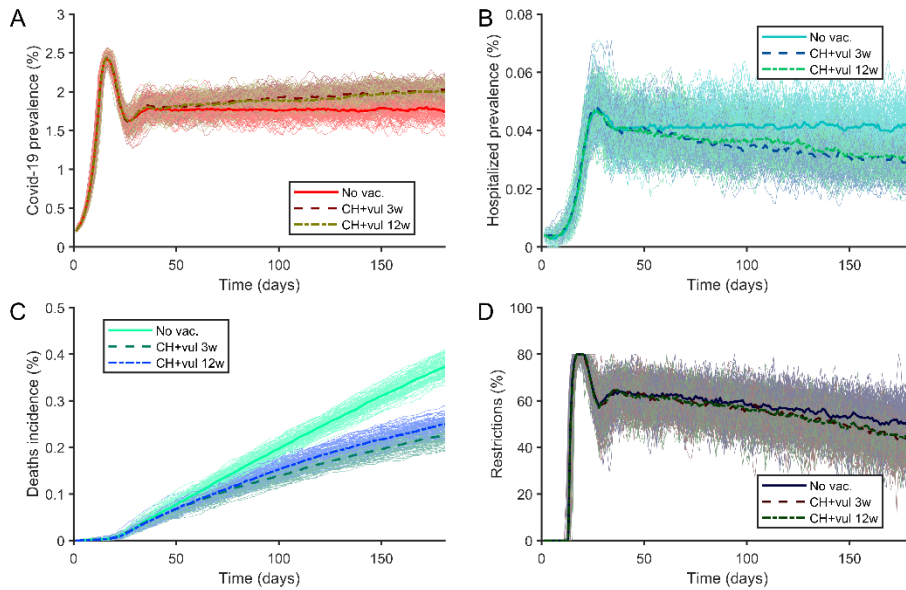

Figure 69. (A) Prevalence of covid-19 cases. (B) Prevalence of hospitalized covid-19 patients. (C) Covid-19 deaths. (D) Restrictions. Solid line for a non-vaccinated population. Dashed line for a population where they are vaccinating first care homes then vulnerable population. Dashed line for doses separation of 3 weeks. Dash-dot line for doses separation of 12 weeks. Figures for Pfizer vaccine using Norway conditions described in table 1.

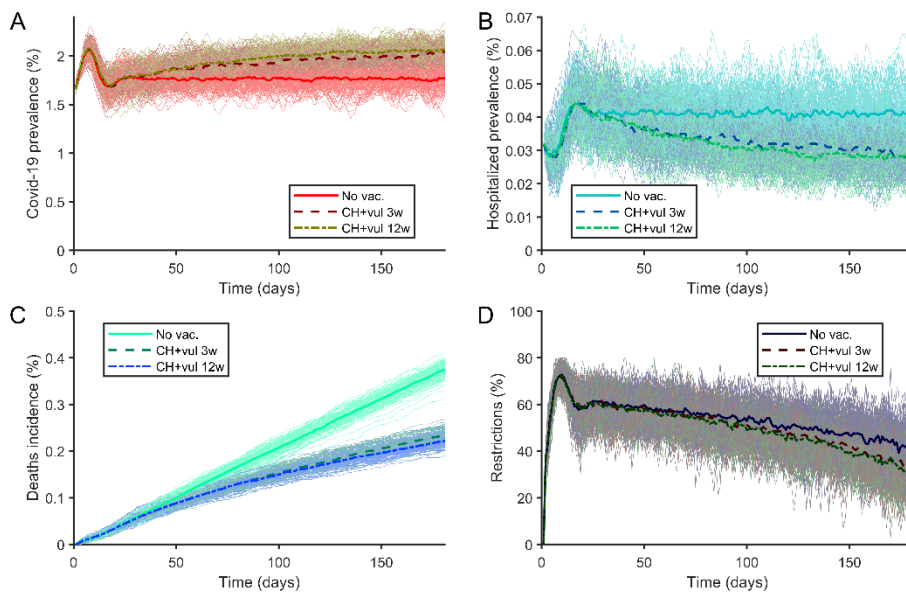

Figure 70. (A) Prevalence of covid-19 cases. (B) Prevalence of hospitalized covid-19 patients. (C) Covid-19 deaths. (D) Restrictions. Solid line for a non-vaccinated population. Dashed line for a population where they are vaccinating first care homes then vulnerable population. Dashed line for doses separation of 3 weeks. Dash-dot line for doses separation of 12 weeks. Figures for AstraZeneca vaccine using Poland conditions described in table 1.

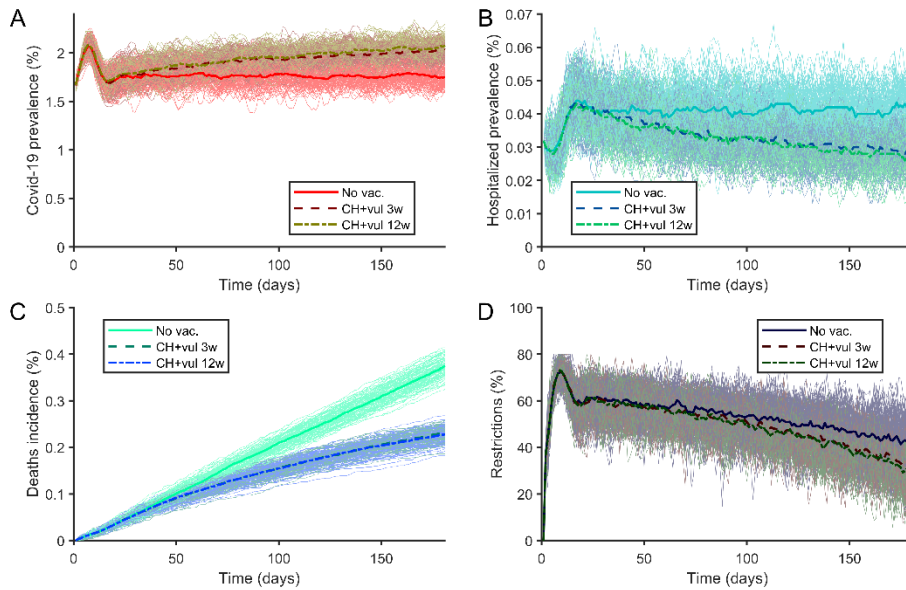

Figure 71. (A) Prevalence of covid-19 cases. (B) Prevalence of hospitalized covid-19 patients. (C) Covid-19 deaths. (D) Restrictions. Solid line for a non-vaccinated population. Dashed line for a population where they are vaccinating first care homes then vulnerable population. Dashed line for doses separation of 3 weeks. Dash-dot line for doses separation of 12 weeks. Figures for Moderna vaccine using Poland conditions described in table 1.

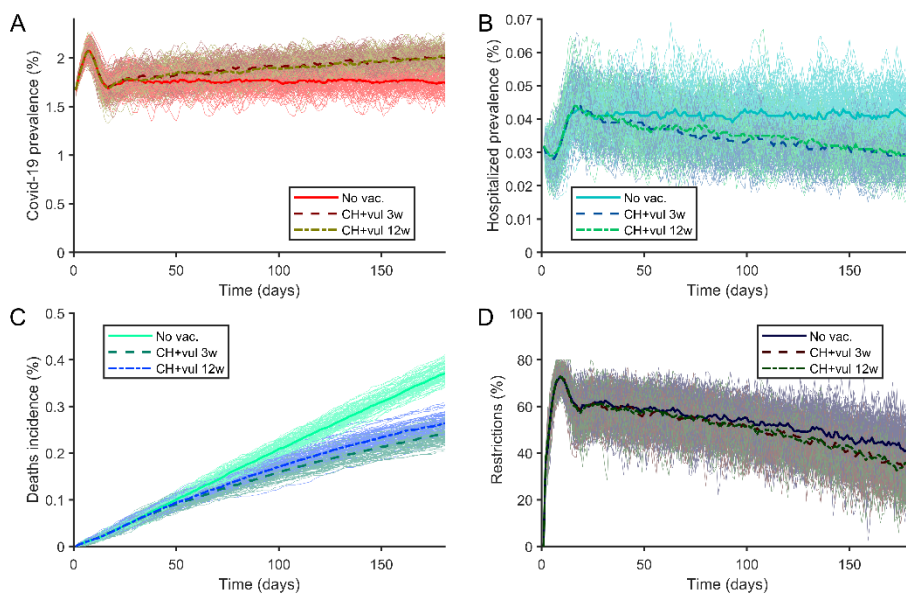

Figure 72. (A) Prevalence of covid-19 cases. (B) Prevalence of hospitalized covid-19 patients. (C) Covid-19 deaths. (D) Restrictions. Solid line for a non-vaccinated population. Dashed line for a population where they are vaccinating first care homes then vulnerable population. Dashed line for doses separation of 3 weeks. Dash-dot line for doses separation of 12 weeks. Figures for Pfizer vaccine using Poland conditions described in table 1.

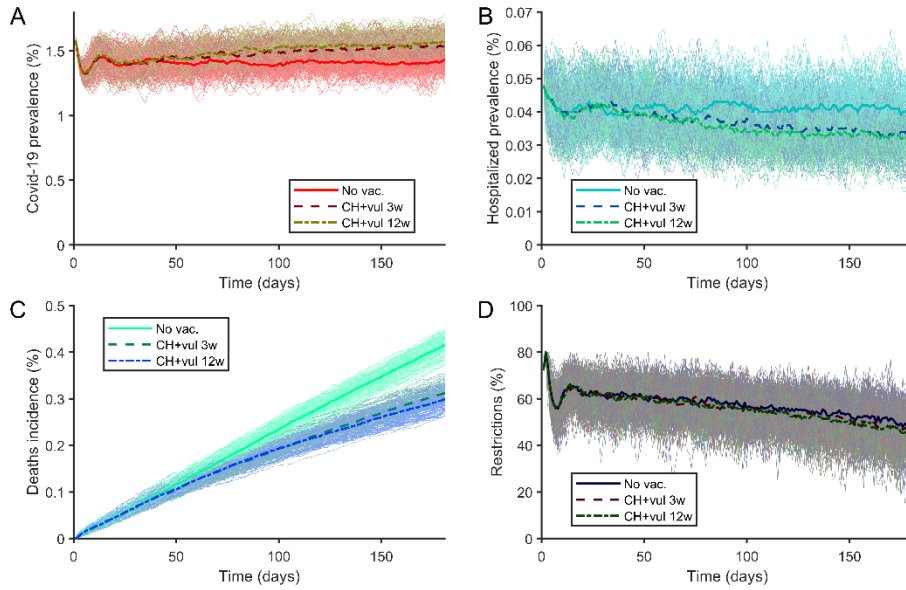

Figure 73. (A) Prevalence of covid-19 cases. (B) Prevalence of hospitalized covid-19 patients. (C) Covid-19 deaths. (D) Restrictions. Solid line for a non-vaccinated population. Dashed line for a population where they are vaccinating first care homes then vulnerable population. Dashed line for doses separation of 3 weeks. Dash-dot line for doses separation of 12 weeks. Figures for AstraZeneca vaccine using Portugal conditions described in table 1.

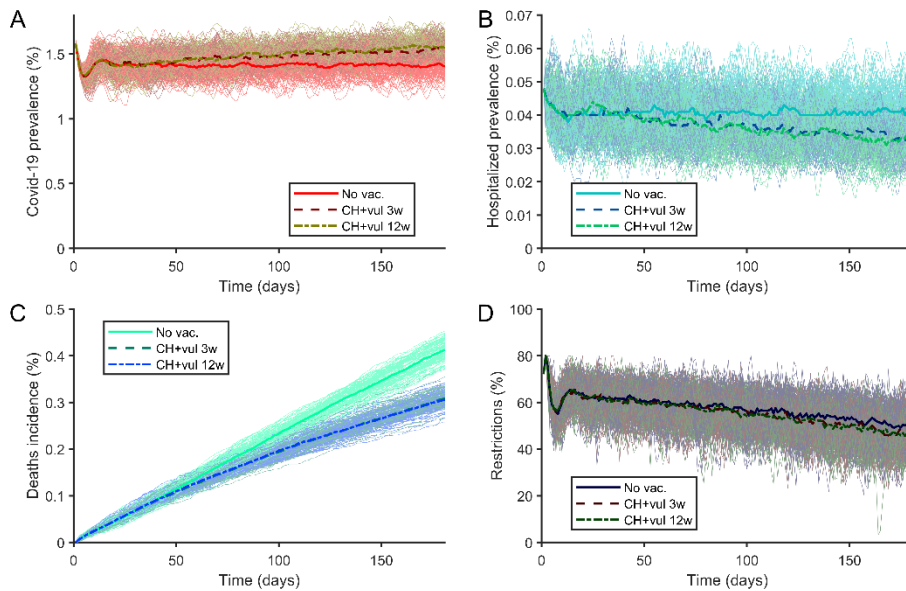

Figure 74. (A) Prevalence of covid-19 cases. (B) Prevalence of hospitalized covid-19 patients. (C) Covid-19 deaths. (D) Restrictions. Solid line for a non-vaccinated population. Dashed line for a population where they are vaccinating first care homes then vulnerable population. Dashed line for doses separation of 3 weeks. Dash-dot line for doses separation of 12 weeks. Figures for Moderna vaccine using Portugal conditions described in table 1.

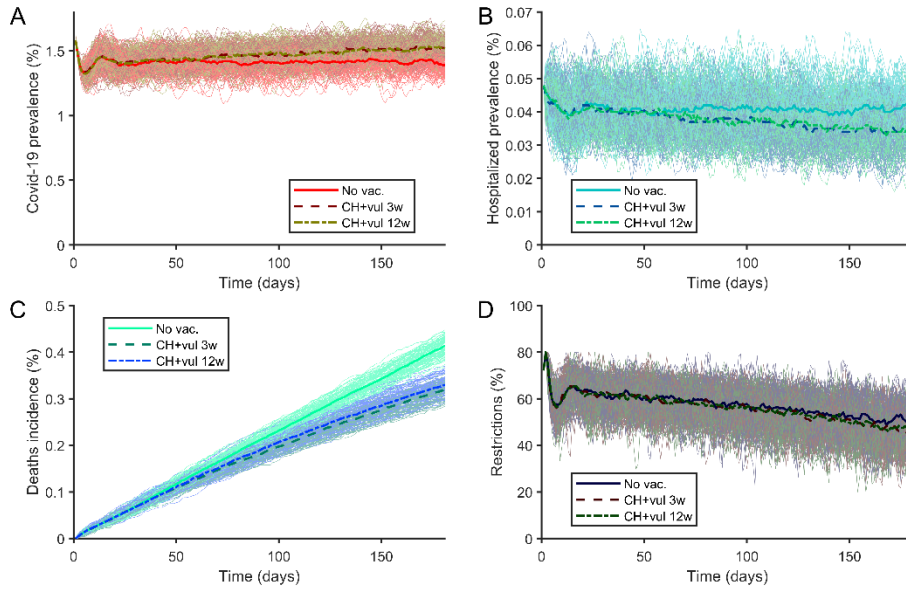

Figure 75. (A) Prevalence of covid-19 cases. (B) Prevalence of hospitalized covid-19 patients. (C) Covid-19 deaths. (D) Restrictions. Solid line for a non-vaccinated population. Dashed line for a population where they are vaccinating first care homes then vulnerable population. Dashed line for doses separation of 3 weeks. Dash-dot line for doses separation of 12 weeks. Figures for Pfizer vaccine using Portugal conditions described in table 1.

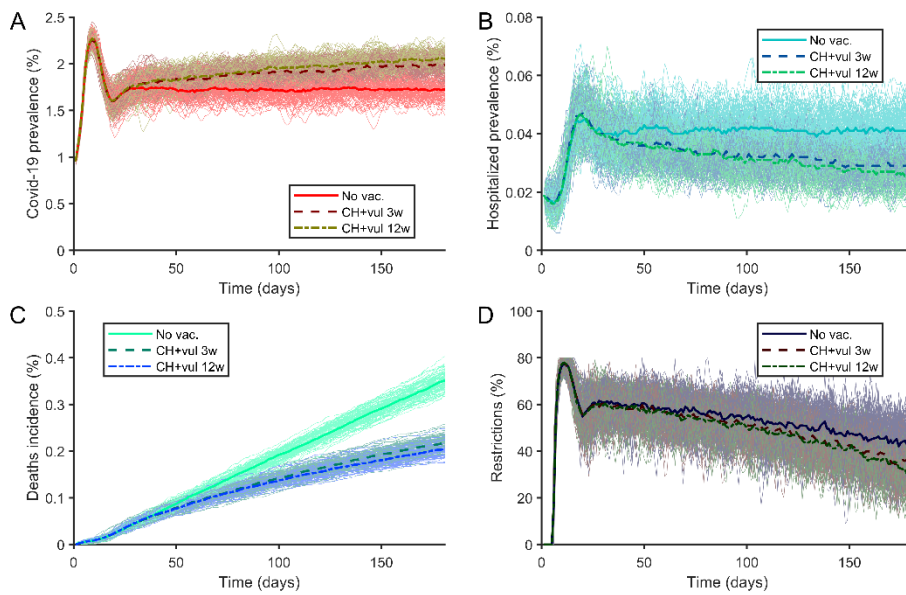

Figure 76. (A) Prevalence of covid-19 cases. (B) Prevalence of hospitalized covid-19 patients. (C) Covid-19 deaths. (D) Restrictions. Solid line for a non-vaccinated population. Dashed line for a population where they are vaccinating first care homes then vulnerable population. Dashed line for doses separation of 3 weeks. Dash-dot line for doses separation of 12 weeks. Figures for AstraZeneca vaccine using Romania conditions described in table 1.

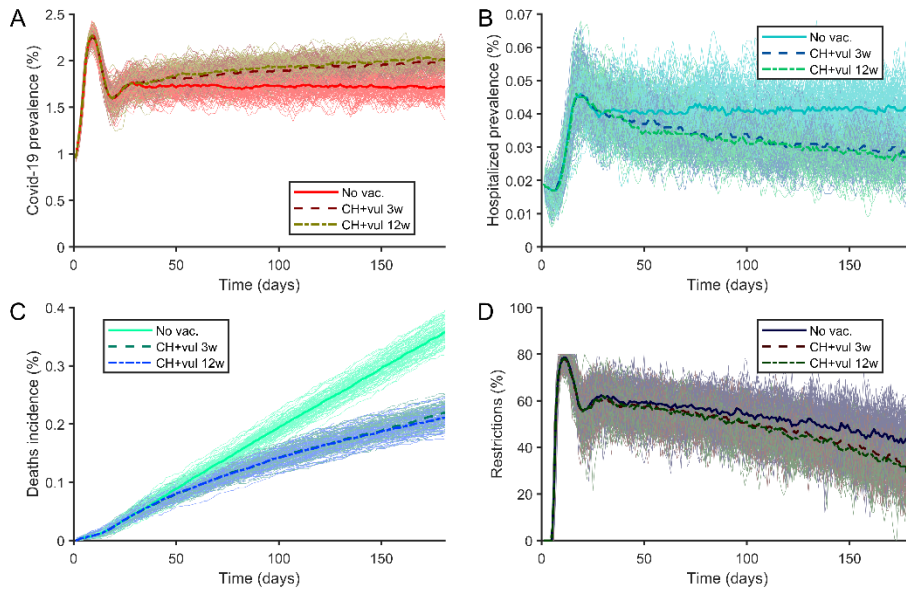

Figure 77. (A) Prevalence of covid-19 cases. (B) Prevalence of hospitalized covid-19 patients. (C) Covid-19 deaths. (D) Restrictions. Solid line for a non-vaccinated population. Dashed line for a population where they are vaccinating first care homes then vulnerable population. Dashed line for doses separation of 3 weeks. Dash-dot line for doses separation of 12 weeks. Figures for Moderna vaccine using Romania conditions described in table 1.

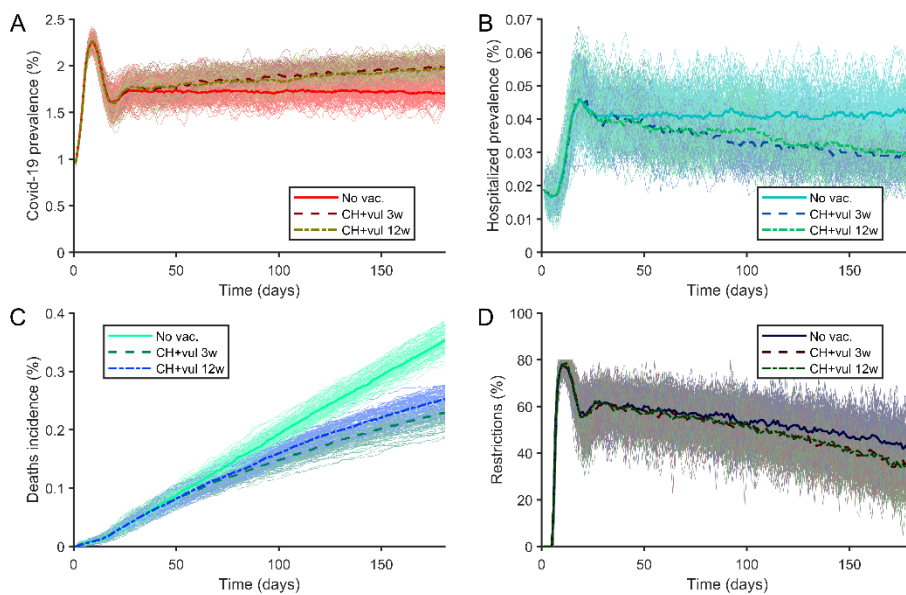

Figure 78. (A) Prevalence of covid-19 cases. (B) Prevalence of hospitalized covid-19 patients. (C) Covid-19 deaths. (D) Restrictions. Solid line for a non-vaccinated population. Dashed line for a population where they are vaccinating first care homes then vulnerable population. Dashed line for doses separation of 3 weeks. Dash-dot line for doses separation of 12 weeks. Figures for Pfizer vaccine using Romania conditions described in table 1.



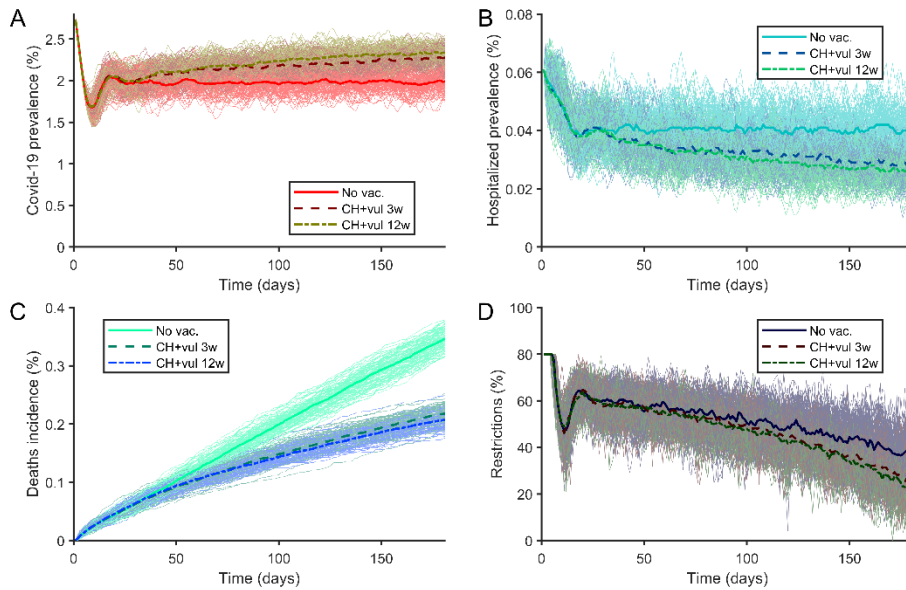

Figure 79. (A) Prevalence of covid-19 cases. (B) Prevalence of hospitalized covid-19 patients. (C) Covid-19 deaths. (D) Restrictions. Solid line for a non-vaccinated population. Dashed line for a population where they are vaccinating first care homes then vulnerable population. Dashed line for doses separation of 3 weeks. Dash-dot line for doses separation of 12 weeks. Figures for AstraZeneca vaccine using Slovakia conditions described in table 1.

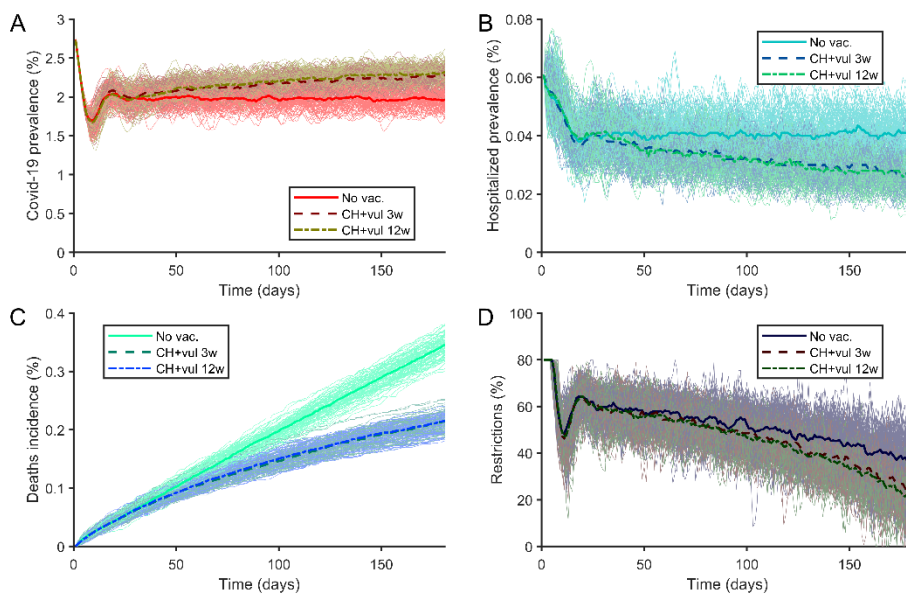

Figure 80. (A) Prevalence of covid-19 cases. (B) Prevalence of hospitalized covid-19 patients. (C) Covid-19 deaths. (D) Restrictions. Solid line for a non-vaccinated population. Dashed line for a population where they are vaccinating first care homes then vulnerable population. Dashed line for doses separation of 3 weeks. Dash-dot line for doses separation of 12 weeks. Figures for Moderna vaccine using Slovakia conditions described in table 1.

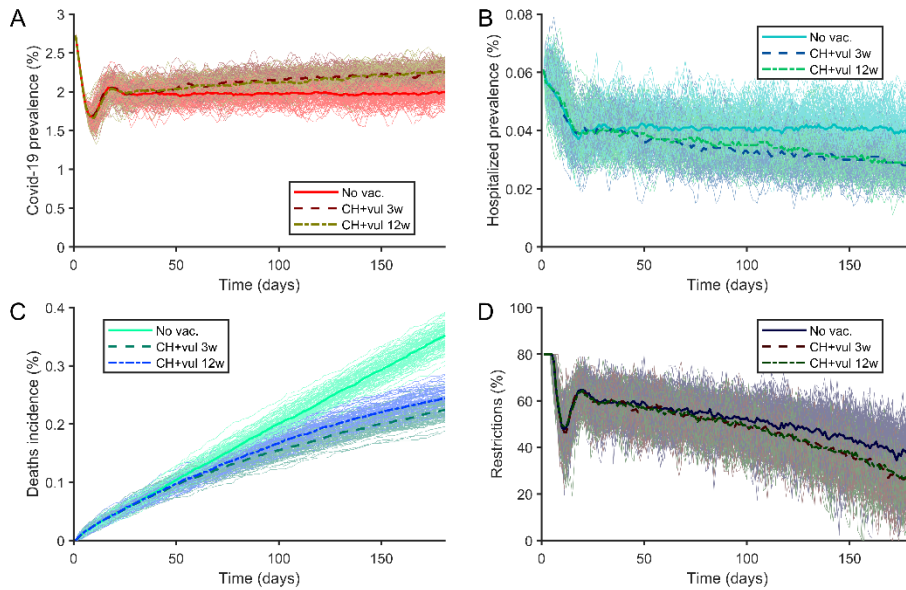

Figure 81. (A) Prevalence of covid-19 cases. (B) Prevalence of hospitalized covid-19 patients. (C) Covid-19 deaths. (D) Restrictions. Solid line for a non-vaccinated population. Dashed line for a population where they are vaccinating first care homes then vulnerable population. Dashed line for doses separation of 3 weeks. Dash-dot line for doses separation of 12 weeks. Figures for Pfizer vaccine using Slovakia conditions described in table 1.

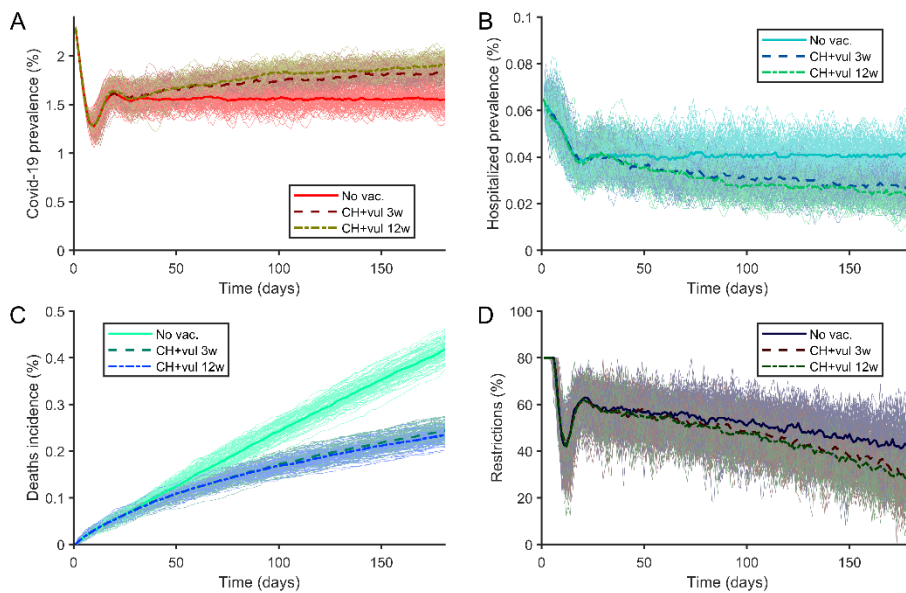

Figure 82. (A) Prevalence of covid-19 cases. (B) Prevalence of hospitalized covid-19 patients. (C) Covid-19 deaths. (D) Restrictions. Solid line for a non-vaccinated population. Dashed line for a population where they are vaccinating first care homes then vulnerable population. Dashed line for doses separation of 3 weeks. Dash-dot line for doses separation of 12 weeks. Figures for AstraZeneca vaccine using Slovenia conditions described in table 1.

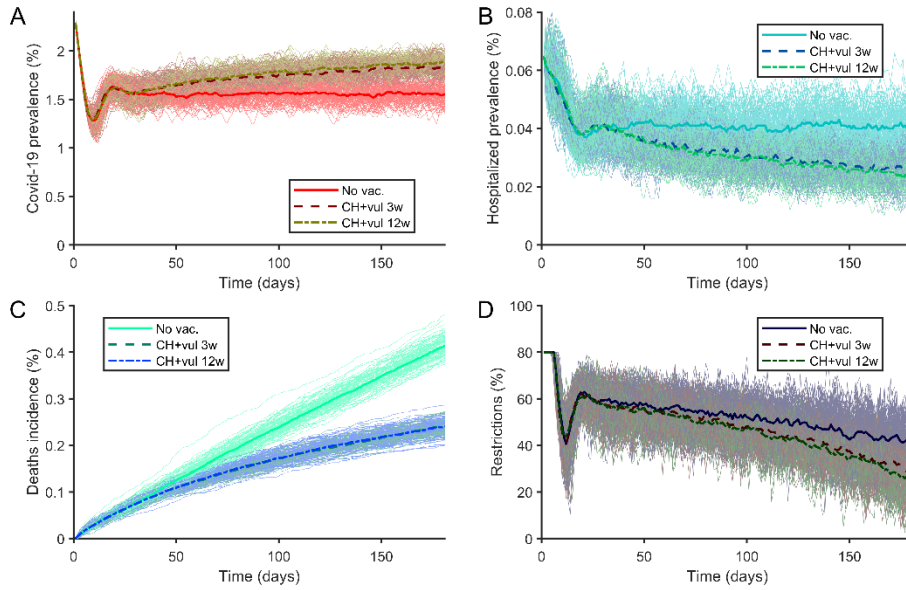

Figure 83. (A) Prevalence of covid-19 cases. (B) Prevalence of hospitalized covid-19 patients. (C) Covid-19 deaths. (D) Restrictions. Solid line for a non-vaccinated population. Dashed line for a population where they are vaccinating first care homes then vulnerable population. Dashed line for doses separation of 3 weeks. Dash-dot line for doses separation of 12 weeks. Figures for Moderna vaccine using Slovenia conditions described in table 1.

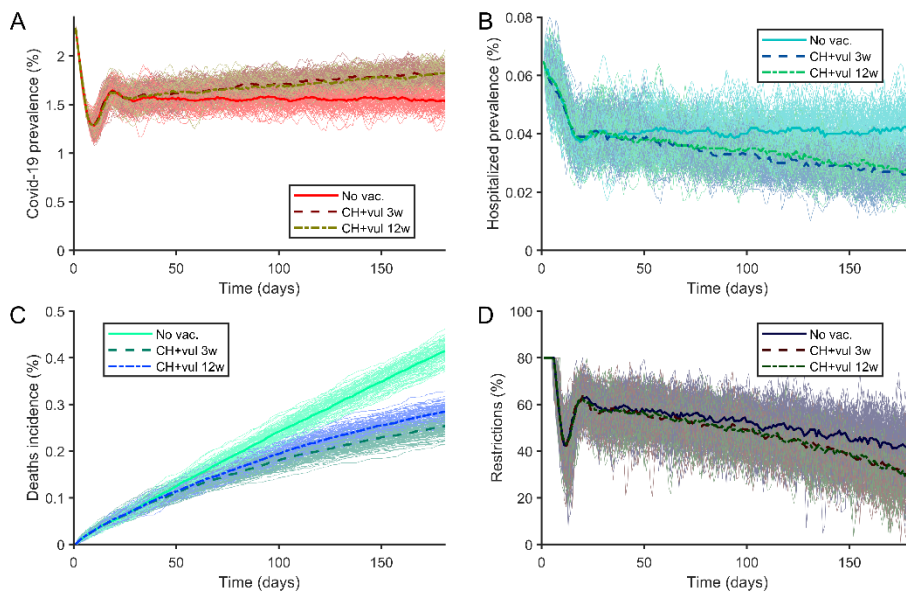

Figure 84. (A) Prevalence of covid-19 cases. (B) Prevalence of hospitalized covid-19 patients. (C) Covid-19 deaths. (D) Restrictions. Solid line for a non-vaccinated population. Dashed line for a population where they are vaccinating first care homes then vulnerable population. Dashed line for doses separation of 3 weeks. Dash-dot line for doses separation of 12 weeks. Figures for Pfizer vaccine using Slovenia conditions described in table 1.

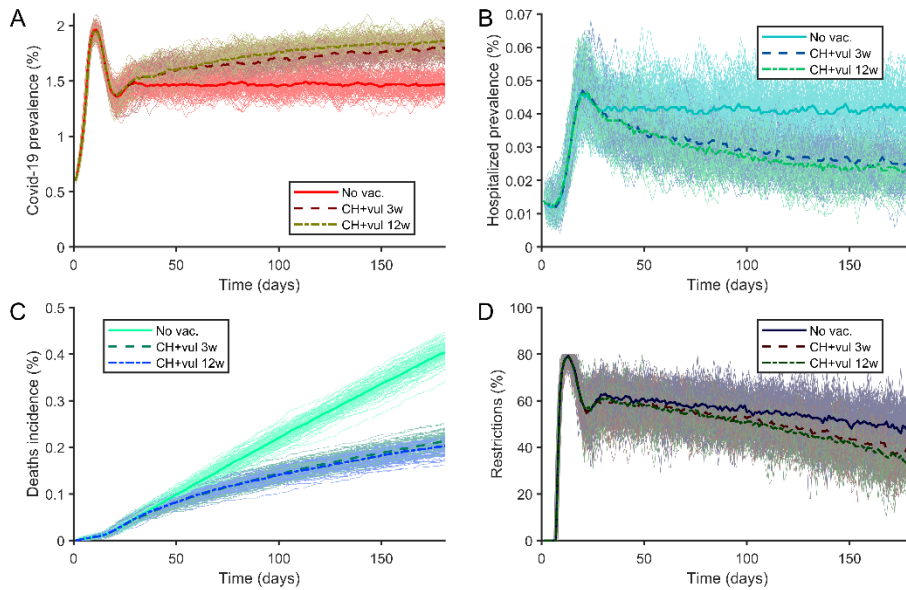

Figure 85. (A) Prevalence of covid-19 cases. (B) Prevalence of hospitalized covid-19 patients. (C) Covid-19 deaths. (D) Restrictions. Solid line for a non-vaccinated population. Dashed line for a population where they are vaccinating first care homes then vulnerable population. Dashed line for doses separation of 3 weeks. Dash-dot line for doses separation of 12 weeks. Figures for AstraZeneca vaccine using Spain conditions described in table 1.

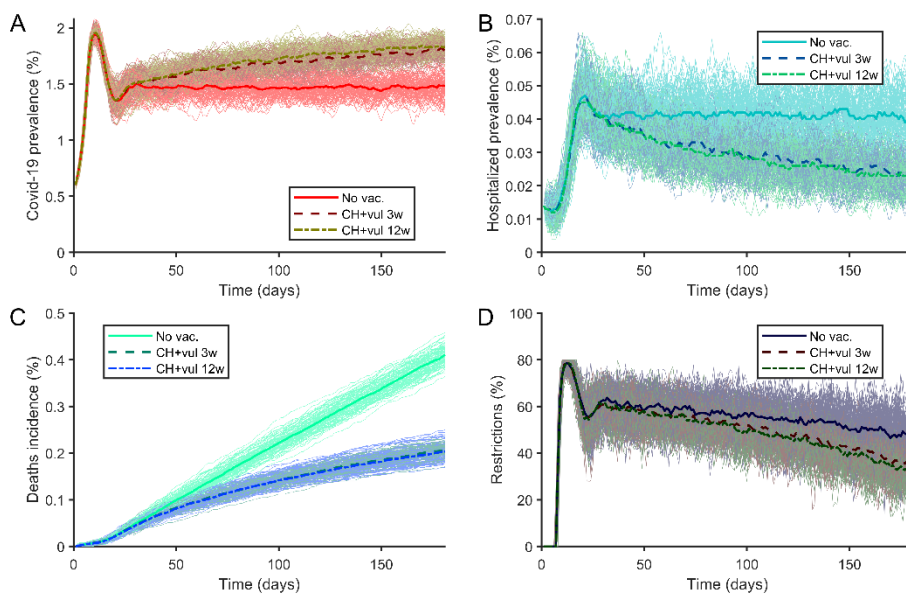

Figure 86. (A) Prevalence of covid-19 cases. (B) Prevalence of hospitalized covid-19 patients. (C) Covid-19 deaths. (D) Restrictions. Solid line for a non-vaccinated population. Dashed line for a population where they are vaccinating first care homes then vulnerable population. Dashed line for doses separation of 3 weeks. Dash-dot line for doses separation of 12 weeks. Figures for Moderna vaccine using Spain conditions described in table 1.

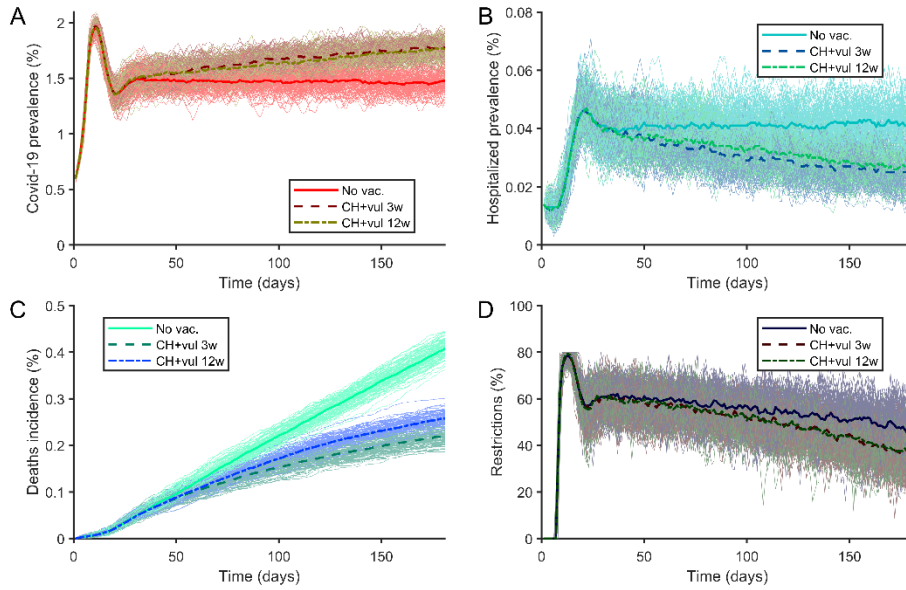

Figure 87. (A) Prevalence of covid-19 cases. (B) Prevalence of hospitalized covid-19 patients. (C) Covid-19 deaths. (D) Restrictions. Solid line for a non-vaccinated population. Dashed line for a population where they are vaccinating first care homes then vulnerable population. Dashed line for doses separation of 3 weeks. Dash-dot line for doses separation of 12 weeks. Figures for Pfizer vaccine using Spain conditions described in table 1.

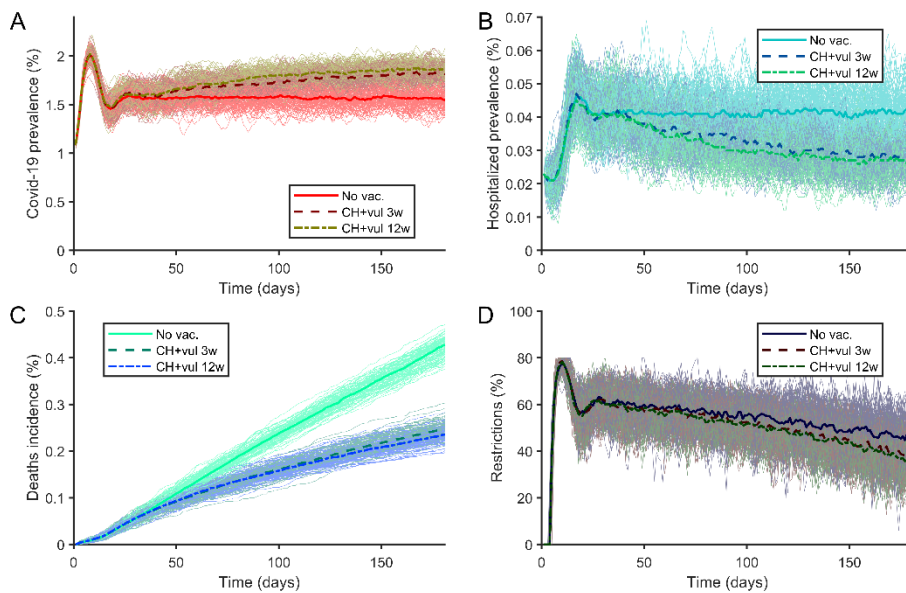

Figure 88. (A) Prevalence of covid-19 cases. (B) Prevalence of hospitalized covid-19 patients. (C) Covid-19 deaths. (D) Restrictions. Solid line for a non-vaccinated population. Dashed line for a population where they are vaccinating first care homes then vulnerable population. Dashed line for doses separation of 3 weeks. Dash-dot line for doses separation of 12 weeks. Figures for AstraZeneca vaccine using Sweden conditions described in table 1.

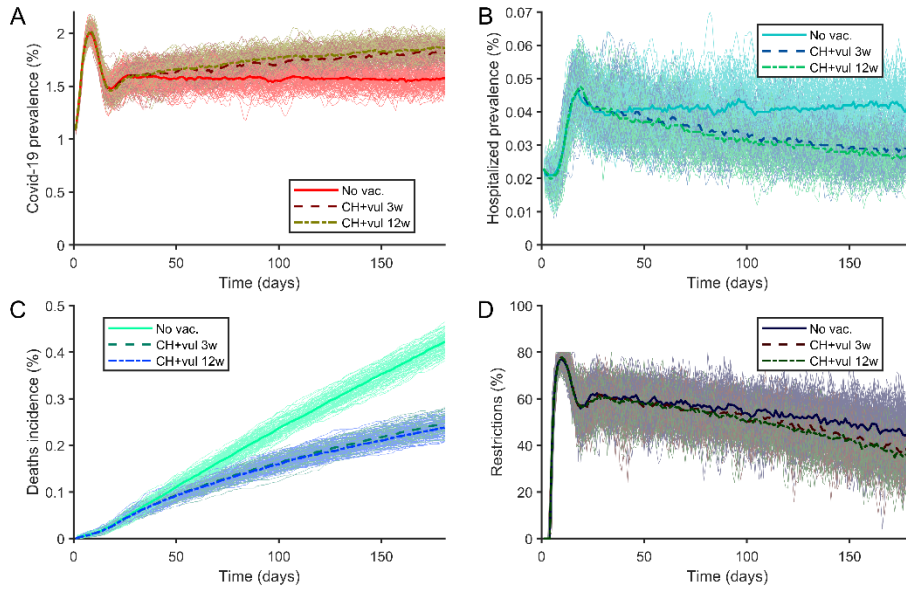

Figure 89. (A) Prevalence of covid-19 cases. (B) Prevalence of hospitalized covid-19 patients. (C) Covid-19 deaths. (D) Restrictions. Solid line for a non-vaccinated population. Dashed line for a population where they are vaccinating first care homes then vulnerable population. Dashed line for doses separation of 3 weeks. Dash-dot line for doses separation of 12 weeks. Figures for Moderna vaccine using Sweden conditions described in table 1.

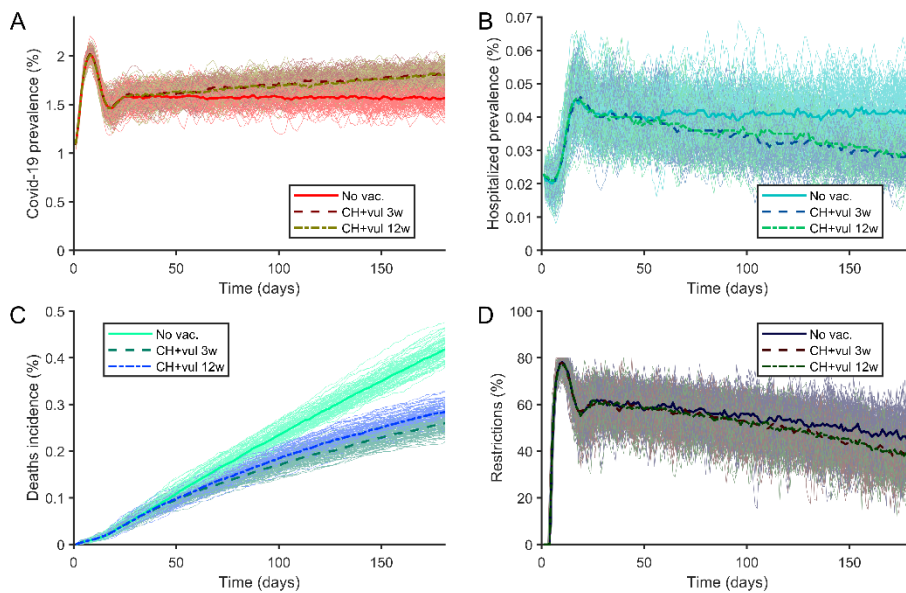

Figure 90. (A) Prevalence of covid-19 cases. (B) Prevalence of hospitalized covid-19 patients. (C) Covid-19 deaths. (D) Restrictions. Solid line for a non-vaccinated population. Dashed line for a population where they are vaccinating first care homes then vulnerable population. Dashed line for doses separation of 3 weeks. Dash-dot line for doses separation of 12 weeks. Figures for Pfizer vaccine using Sweden conditions described in table 1.

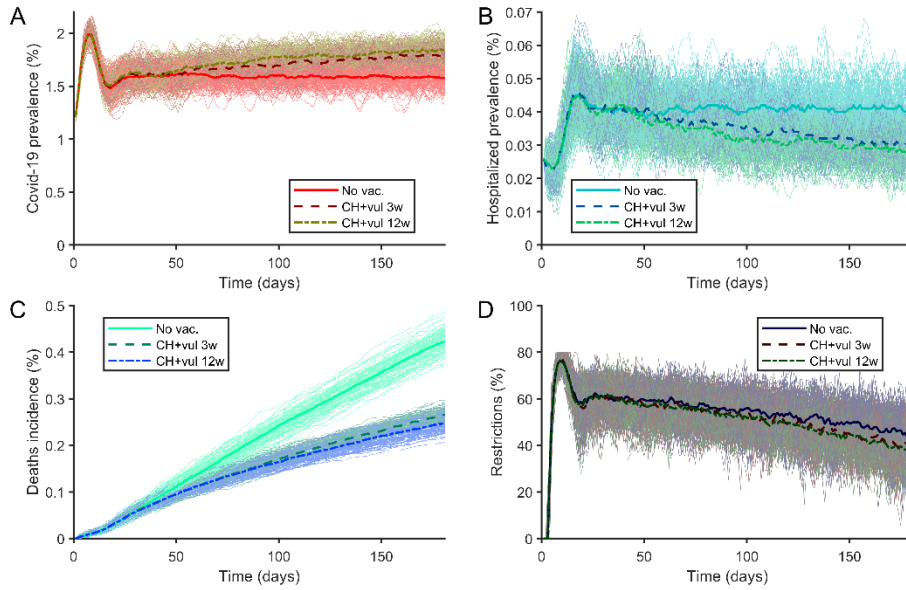

Figure 91. (A) Prevalence of covid-19 cases. (B) Prevalence of hospitalized covid-19 patients. (C) Covid-19 deaths. (D) Restrictions. Solid line for a non-vaccinated population. Dashed line for a population where they are vaccinating first care homes then vulnerable population. Dashed line for doses separation of 3 weeks. Dash-dot line for doses separation of 12 weeks. Figures for AstraZeneca vaccine using Switzerland conditions described in table 1.

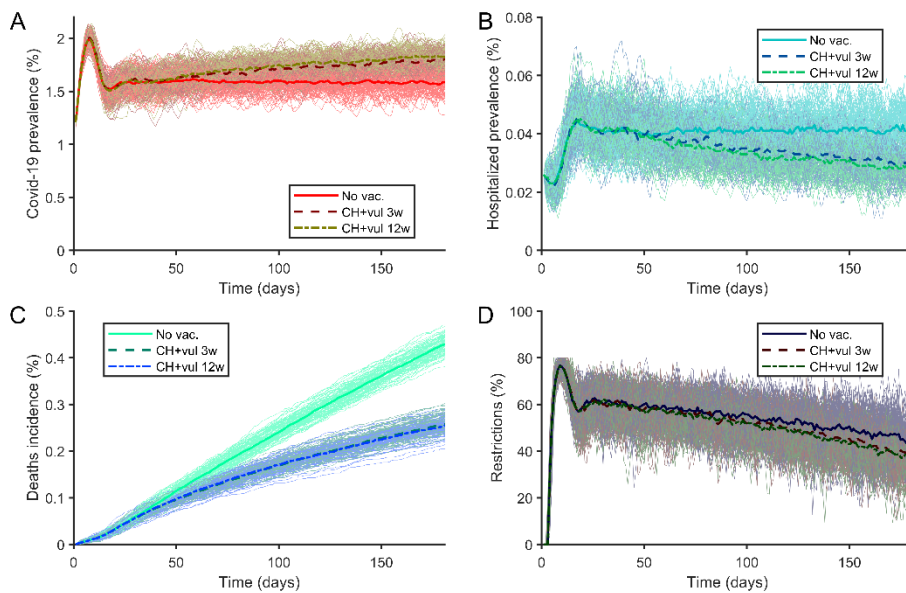

Figure 92. (A) Prevalence of covid-19 cases. (B) Prevalence of hospitalized covid-19 patients. (C) Covid-19 deaths. (D) Restrictions. Solid line for a non-vaccinated population. Dashed line for a population where they are vaccinating first care homes then vulnerable population. Dashed line for doses separation of 3 weeks. Dash-dot line for doses separation of 12 weeks. Figures for Moderna vaccine using Switzerland conditions described in table 1.

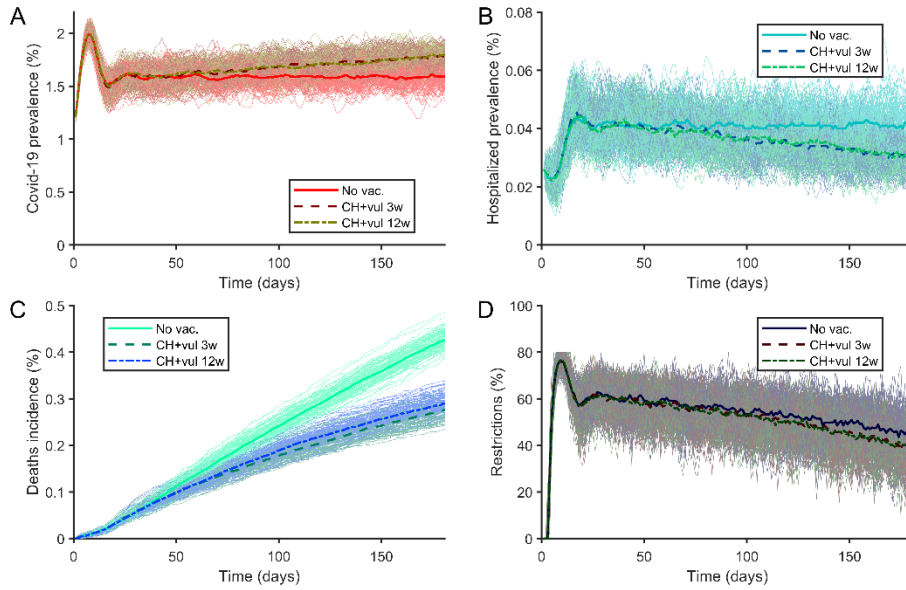

Figure 93. (A) Prevalence of covid-19 cases. (B) Prevalence of hospitalized covid-19 patients. (C) Covid-19 deaths. (D) Restrictions. Solid line for a non-vaccinated population. Dashed line for a population where they are vaccinating first care homes then vulnerable population. Dashed line for doses separation of 3 weeks. Dash-dot line for doses separation of 12 weeks. Figures for Pfizer vaccine using Switzerland conditions described in table 1.

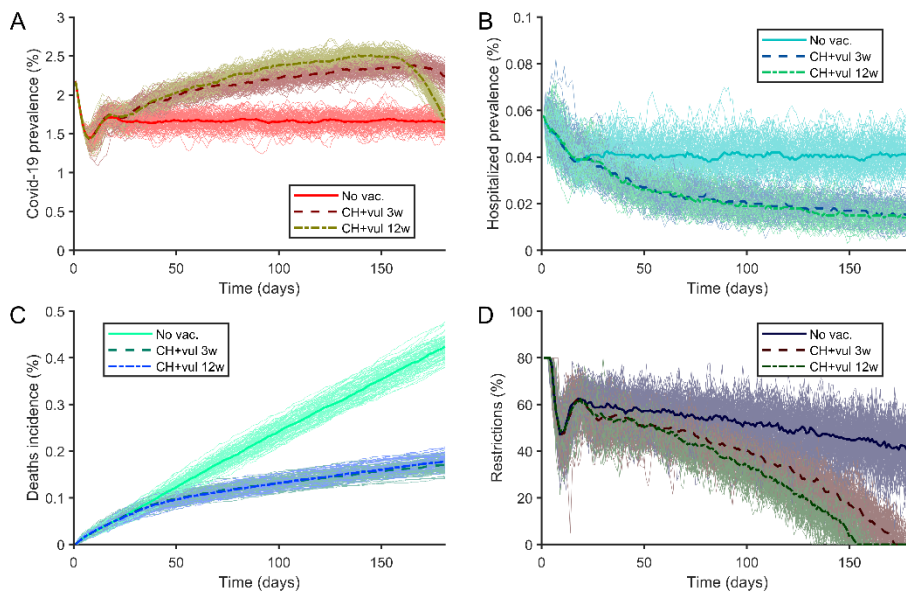

Figure 94. (A) Prevalence of covid-19 cases. (B) Prevalence of hospitalized covid-19 patients. (C) Covid-19 deaths. (D) Restrictions. Solid line for a non-vaccinated population. Dashed line for a population where they are vaccinating first care homes then vulnerable population. Dashed line for doses separation of 3 weeks. Dash-dot line for doses separation of 12 weeks. Figures for AstraZeneca vaccine using United Kingdom conditions described in table 1.



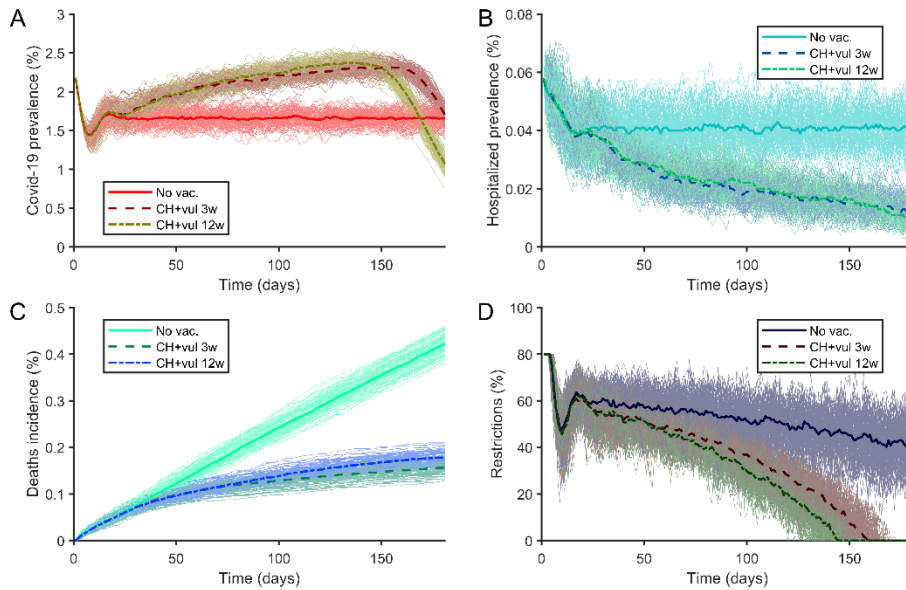

Figure 95. (A) Prevalence of covid-19 cases. (B) Prevalence of hospitalized covid-19 patients. (C) Covid-19 deaths. (D) Restrictions. Solid line for a non-vaccinated population. Dashed line for a population where they are vaccinating first care homes then vulnerable population. Dashed line for doses separation of 3 weeks. Dash-dot line for doses separation of 12 weeks. Figures for Moderna vaccine using United Kingdom conditions described in table 1.

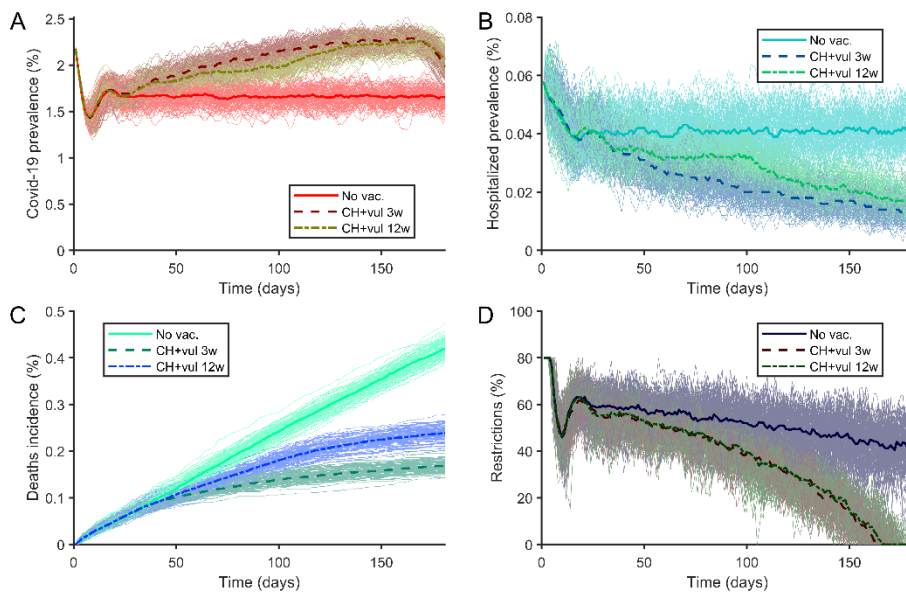

Figure 96. (A) Prevalence of covid-19 cases. (B) Prevalence of hospitalized covid-19 patients. (C) Covid-19 deaths. (D) Restrictions. Solid line for a non-vaccinated population. Dashed line for a population where they are vaccinating first care homes then vulnerable population. Dashed line for doses separation of 3 weeks. Dash-dot line for doses separation of 12 weeks. Figures for Pfizer vaccine using United Kingdom conditions described in table 1.

References:

1. Eurostat [Internet]. [cited 2021 Feb 18]. Available from: <https://appsso.eurostat.ec.europa.eu/nui/submitViewTableAction.do>
2. Coronavirus Pandemic Data Explorer [Internet]. [cited 2021 Feb 10]. Available from: [https://ourworldindata.org/coronavirus-data-explorer?zoomToSelection=true&time=2020-03-01..latest&country=IND~USA~GBR~CAN~DEU~FRA&region=World&vaccinationsMetric=true&interval=smoothed&perCapita=true&smoothing=7&pickerMetric=total\\_cases&pickerSort=desc](https://ourworldindata.org/coronavirus-data-explorer?zoomToSelection=true&time=2020-03-01..latest&country=IND~USA~GBR~CAN~DEU~FRA&region=World&vaccinationsMetric=true&interval=smoothed&perCapita=true&smoothing=7&pickerMetric=total_cases&pickerSort=desc)
3. Scheil-Adlung X, Others. Long-term care protection for older persons: A review of coverage deficits in 46 countries. ILO; 2015.
4. Nursing and elderly home beds per 100 000 [Internet]. [cited 2021 Feb 10]. Available from: [https://gateway.euro.who.int/en/indicators/hfa\\_490-5100-nursing-and-elderly-home-beds-per-100-000/](https://gateway.euro.who.int/en/indicators/hfa_490-5100-nursing-and-elderly-home-beds-per-100-000/)
5. OECD. Long-Term Care Resources and Utilisation : Long-term care recipients [Internet]. [cited 2021 Feb 10]. Available from: <https://stats.oecd.org/index.aspx?queryid=30143>
